# Supplementary material for: Structure of tRNA methyltransferase complex of Trm7 and Trm734 reveals a novel binding interface for tRNA recognition
Source: PubMed Central journal article supplement — Nucleic Acids Res. 2019 Oct 5;47(20):10942–55. doi: 10.1093/nar/gkz856 (PMC6847430; doi:10.1093/nar/gkz856), 2019-10-05

## Supplementary File

### **Structure of tRNA methyltransferase complex of Trm7 and Trm734 reveals a novel binding interface for tRNA recognition**

**Akira Hirata<sup>1\*</sup>, Keisuke Okada<sup>1\*</sup>, Kazuaki Yoshii<sup>1</sup>, Hiroyuki Shiraishi<sup>1</sup>, Shinya Saijo<sup>2</sup>, Kento Yonezawa<sup>2</sup>, Nobutaka Shimizu<sup>2</sup>, and Hiroyuki Hori<sup>1</sup>**

\*These authors equally contributed to this work.

<sup>1</sup> Department of Materials Science and Biotechnology, Graduate school of Science and Engineering, Ehime University, 3 Bunkyo-cho, Matsuyama, Ehime 790-8577, Japan

<sup>2</sup> Photon Factory, Institute of Materials Structure Science, High Energy Accelerator Research Organization (KEK) 1-1 Oho, Tsukuba, Ibaraki 305-0801, Japan

#### **To whom correspondence should be addressed:**

Hiroyuki Hori,

Department of Materials Science and Biotechnology, Graduate School of Science and Engineering, Ehime University, 3 Bunkyo-cho, Matsuyama, Ehime 790-8577, Japan.

Phone: 81-89-927-8548

e-mail: hori.hiroyuki.my@ehime-u.ac.jp

## SUPPORTING MATERIALS AND METHODS

### Construction of expression vectors

The *trm7* gene was amplified by polymerase chain reaction (PCR) with two primers (*trm7F* and *trm7R*), and then ligated into a TA-cloning vector pMD20-T by using a Mighty TA-cloning kit (TAKARA, Japan). For the construction of expression system of Trm7 in *E. coli* BL21 (DE3) Rosetta 2 strain, the *trm7* gene was further inserted between T7 promoter and terminator in the expression vector pET30a (Novagen) using the In-Fusion HD Cloning Kit (Clontech) with the four primers (*in-trm7F*, *in-trm7R*, *pE30F* and *pE30R*). The primer of *in-trm7R* includes sequences of 6×His-tag with HRV-3C protease site at the C-terminal of Trm7. For the construction of co-expression systems of Trm7-Trm732 and Trm7-Trm734 in *E. coli* BL21 (DE3) Rosetta 2 strain, the *trm7* gene was initially inserted between T7 promoter and terminator in the expression vector pET21a (Novagen) using the primers (*in-trm7F*, *in-trm7R*, *pE21F* and *pE21R*). The *trm732* and *trm734* genes are amplified by PCR, and then inserted between T7 promoter and terminator in the pET21a, respectively, with the following primers, *in-trm732F*, *in-trm732R*, *in-trm734F*, *in-trm734R*, *pE21F* and *pE21R*. The primers of *in-trm732R* and *in-trm734R* include sequences of 6×His-tag at the C-terminal of Trm732 and Trm734. The

amplified *trm732* and *trm734* genes by PCR, which include the T7 promoter at the upstream of each gene in the pET21a, were, respectively, inserted into the site between the stop codon of *trm7* gene and T7 terminator in the pET21a harboring *trm7* gene by using the in-fusion system with the primers (trm7-vecF, trm7-vecR, coex-inF, coex-inR32 and coex-inR34). The constructions of co-expression plasmids harboring *trm7-trm732* or *trm7-trm734* genes were verified by DNA sequencing.

### **Small angle X-ray scattering (SAXS) data collection and processing**

Prior to the measurement of SAXS data, the concentrated samples were loaded onto a Superdex 200 column (GE Healthcare) equilibrated with the buffer [50 mM HEPES-KOH (pH 8.0), 10 mM 2-mercaptoethanol, 200mM KCl and 5% Glycerol], and the eluted samples were diluted with the buffer to each final concentration as shown in Table S4A. The concentration variation series of apo Trm7-Trm734 were loaded into a stainless-steel cell of 1.25 mm light pass with a 0.02 mm-thick quartz glass window. These samples were measured at 6 different concentrations (details are shown in Table S4A) in the same buffer. Ovalbumin (45 kDa; Sigma-Aldrich) was also measured for estimation of the apparent molecular weight. The scattering intensities ( $I(Q)$ ) were measured in the region of approximately  $0.01 < Q < 0.4 \text{ \AA}^{-1}$ ,

where  $Q = 4\pi \sin\theta/\lambda$  and  $\lambda = 1 \text{ \AA}$ , at the distance between sample and detector of about 2 m (Table S4B). The exposure times and the number of images were 10 sec and 40 images. The scattering images were recorded on a PILATUS3 2M detector (Dectris). Each scattering image was circularly averaged and converted to the scattering intensity profiles and subtracted background by *SAnkler* software (1). Sample radiation damages were monitored by data frame-by-frame comparison. The scattering intensities converted to an absolute scale were used by water scattering as a standard. Extrapolation to zero concentration was performed by the program *PRIMUSqt* of the program package *ATSAS* (2-4). Scattering intensities at zero angle ( $I(0)$ ) and radius of gyration ( $R_g$ ) were calculated under the condition of Guinier approximation by using *AUTORG* (5). The pair distribution function ( $P(r)$ ) was obtained by using *GNOM* and maximum size parameter ( $D_{\max}$ ) was estimated based on  $P(r)$  function (6). Molecular Weights from  $I(0)$  are calculated by using *SAXSMoW* (v2.1) (7). Profiles attribute to scattering experiment are shown in Supplementary Figure S5 and Table S4D.

Automatic *ab initio* modeling was performed by using the DAMMIF module of *PRIMUSqt*.

In this module, the program *DAMMIF* (8) firstly generated 20 dummy atom models and the program *DAMAVER* (9) secondary averaged these models. Finally, the program *DAMMIN*

(10) generated the final model with the initial model that *DAMAVER* outputted. In order to optimize the position of Trm7 including terminal linkers (residue 1-8 and 260-310) and Trm734 by rigid body modeling, crystal structures of these domains separated from crystal structures (PDB) were used to fit SAXS scattering data using program *CORAL* (2). According to our obtained X-ray crystal structure, approximate positions were limited by contacts (contact positions are described in Table S4F). The obtained rigid body models were superimposed on the dummy atom model using the program *SUPCOMB* (11). The structure obtained from *CORAL* (Figure 1C) was drawn by *Chimera* ver 1.12 (12). This structure information is submitted to small angle scattering biological data bank (SASBDB; <https://www.sasbdb.org/aboutSASBDB/>) (13). Deposited SASBDB ID is SASDDR3.

In addition to SAXS data of apo Trm7-Trm734, that of Trm7-Trm734 in complex with tRNA<sup>Phe</sup> and sinefungin was also obtained on the BL45XU beamlines at SPring-8 (Hyogo, Japan). The method for the sample preparation of this complex was the same with that of apo Trm7-Trm734. Five concentration variation series of the Trm7-Trm734-tRNA<sup>Phe</sup> complex was load into a cuvette of 3 mm light pass with a 0.02 mm-thick quartz glass window (shown in Table S4A). The scattering intensities of the Trm7-Trm734-tRNA<sup>Phe</sup> complex in almost the

same region of Trm7-Trm734 were recorded on a PILATUS 300K-W detector (Dectris), where the wavelength and the camera distance are 1 Å and about 2 m respectively (Table S4B). The exposure times and the number of images were set to 1 sec and 20 images respectively. The procedure and the software for data processing and analyses are the same as those of apo Trm7-Trm734. Resultant profiles and Guinier analyses are also shown in Supplementary Figure S5 and Table S4D.

## REFERENCES in Supplementary file

1. Shimizu, N., Nagatani, Y., S. Kosuge, T. and Igarashi, N. (2016) Software development for analysis of small-angle x-ray scattering data. *AIP Conference Proceedings*, **1741**, 050017.
2. Franke, D., Petoukhov, M. V., Konarev, P. V., Panjkovich, A., Tuukkanen, A., Mertens, H. D. T., Kikhney, A. G., Hajizadeh, N. R., Franklin, J. M., Jeffries, C. M. *et al.* (2017) ATSAS 2.8: a comprehensive data analysis suite for small-angle scattering from macromolecular solutions. *J. Appl. Crystallogr.*, **50**, 1212-1225.
3. Petoukhov, M. V., Franke, D., Shkumatov, A. V., Tria, G., Kikhney, A. G., Gajda, M., Gorba, C., Mertens, H. D., Konarev, P. V. and Svergun, D. I. (2012) New developments in the ATSAS program package for small-angle scattering data analysis. *J. Appl. Crystallogr.*, **45**, 342-350.
4. Konarev, P. N., Volkov, V. V., Sokolova, A. V., Kock, M. H. and Svergun, D. I. (2003) *PRIMUS*: a Windows PC-based system for small-angle scattering data analysis. *J. Appl. Crystallogr.*, **36**, 1277-1282.
5. Petoukhov, M. V., Konarev, P. V., Kikhney, A. G. and Svergun, D. I. (2007) ATSAS 2.1 - Towards automated and web-supported small-angle scattering data analysis. *J. Appl. Crsystallogr.*, **45**, 223-228.
6. Svergun, D. I. (1992) Determination of the regularization parameter in indirect-transform methods using perceptual criteria. *J. Appl. Crystallogr.*, **25**, 495-503.
7. Fischer, H., De Oliveira Neto, M., Napolitano, H. B., Polikarpov, I. and Graievich, A. F. (2010) Determination of the molecular weight of proteins in solution from a single small-angle X-ray scattering measurement on a relative scale. *J. Appl. Crystallogr.*, **43**, 101-109.
8. Franke, D. and Svergun, D. I. (2009) DAMMIF, a program for rapid ab-initio shape determination in small-angle scattering. *J. Appl. Crystallogr.*, **36**, 860-864.
9. Volkov, V. V. and Svergun, D. I. (2003) Uniqueness of ab initio shape determination in small-angle scattering. *J. Appl. Crystallogr.*, **36**, 860-864.
10. Svergun, D. I. (1999) Restoring low resolution structure of biological macromolecules from solution scattering using simulated annealing. *Biophys J.*, **76**, 2879-2886.
11. Kozin, M. B. and Svergun, D. I. (2001) Automated matching of high- and low-resolution structural models. *J. Appl. Crystallogr.*, **34**, 33-41.
12. Pettersen, E. F., Goddard, T. D., Huang, C. C., Couch, G. S., Greenblatt, D. M., Meng, E. C.

- and Ferrin, T. E. (2004) UCSF Chimera--a visualization system for exploratory research and analysis. *J. Comput. Chem.*, **25**, 1605-1612.
13. Svergun, D., Barbetato, C. and Koch, M. H. (1995) CRY SOL - A program to evaluate X-ray solution scattering of biological macromolecules from atomic coordinates. *J. Appl. Crystallogr.*, **28**, 768-773.
  14. Valentini, E., Kikhney, A. G., Previtali, G., Jeffries, C. M. and Svergun, D. I. (2015) SASBDB, a repository for biological small-angle scattering data. *Nucleic Acids Res.*, **43**, D357-363.
  15. Chenna, R. *et al.* Multiple sequence alignment with the Clustal series of programs. (2003) *Nucleic Acids Res.*, **31**, 3497-3500.
  16. Gouet, P., Robert, X. and Courcelle, E. ESPript/ENDscript: Extracting and rendering sequence and 3D information from atomic structures of proteins. (2003) *Nucleic Acids Res.*, **31**, 3320-3323.



## Supplementary Table S1.

Primers for the constructions of co-expression vectors for Trm7-Trm732 and Trm7-Trm734

---

### **trm7F**

Forward

5'-ATGGGTAAGAGCAGCAAAGATAAAAGAGAT-3'

### **trm7R**

Reverse

5'-TCAAAGTCTAGTGAGTTTCCCGC-3'

### **in-trm7F**

Forward

5'-**AGAAGGAGATATACAT**ATGGGTAAGAGCAGCAAAGATAAAAGAGATTG-3'

### **in-trm7R**

Reverse

5'-**ATGGTGATGGTGATG**GGAGGGTCCCTGAAAGAGGACTTCAAGAACT  
GATCTAGTGAGTTTCCCGCTCCTTTTAA-3'

### **in-trm732F**

Forward

5'-**AGAAGGAGATATACAT**ATGACTACGGATGTGCAATTTCAAGTCAGGA AAT-3'

### **in-trm732R**

Reverse

5'-**ATGGTGATGGTGATG**TAATTGGGAATAACTGATAATTAGGGGATGAAC AGAAT-3'

### **in-trm734F**

Forward

5'-**AGAAGGAGATATACAT**ATGAAGGACTTGTCTCATTATGGTCCTGC-3'

### **in-trm734R**

Reverse

5'-**ATGGTGATGGTGATG**TTTTTCCAAATTGATAAACCAACACCTCCGAT CAG-3'

### **trm7-VecF**

Forward

5'-**GGATCCGAATTCGAG**CTCCGTCG-3'

### **trm7-VecR**

Reverse

5'-**TTAGTGATGGTGATG**GTGATGGGAGG-3'

**coex-inF**

Forward

5'-**CATCACCATCACTAA**TAATACGACTCACTATAGGGGAATTGTGAGC-3'

**coex-inR32**

Reverse

5'-**CTCGAATTCGGATCC**TTAGTGATGGTGATGGTGATGTAATTGGGAATAA-3'

**coex-inR34**

Reverse

5'-**CTCGAATTCGGATCC**TTAGTGATGGTGATGGTGATGGTGATGTTTTT  
TCCAAATTG-3'

**pE30F**

Forward

5'-**TGAGGATCCGAATTC**GAGCTCCGT-3'

**pE30R**

Reverse

5'-**CATATGTATATCTCC**TTCTTAAAGTTAAACAAAATTATTTTC-3'

**pE21F**

Forward

5'-**CATCACCATCACCAT**CACTAAGGATCCG-3'

**pE21R**

Reverse

5'-**ATGTATATCTCCTTCT**TAAAGTTAAACAAAATTATTTCTAGAGGG-3'

---

The bold show a primers name. homologous recombination sequences colored red. The green sequences denote a HRV3C-protease site in the primer of in-trm7R. The homologous recombination sequences of in-trm732R and in-trm734R primers are comprised of 6×His-tag sequences.

## Supplementary Table S2.

Primers list for the constructions of A26P mutant and deletion mutants ( $\Delta_{233-310}$  Trm7 and  $\Delta_{260-310}$  Trm7).

---

### **A26P**

#### Forward

5'-CTATAGGGCTAGATCT**CCG**TTCAAACACTTCAAC-3'

#### Reverse

5'-GTTGAAGTAGTTTGAAC**CGG**AGATCTAGCCCTATAG-3'

### **Deletion ( $\Delta_{233-310}$ Trm7)**

#### Forward

CAAAAAACAGCCTTGAAAAAATTCATC

#### Reverse

CTTGAAGTCCTCTTTCAGGGACC

### **Deletion ( $\Delta_{260-310}$ Trm7)**

#### Forward

5'-AGTCTTCAAAGTTTCGACTCAGATGCCACTTATC-3'

#### Reverse

5'-TCCACAAGCCATAAATTCGGCTATGTTTCTCTCC-3'

---

The bold show a primers name. Mutational sequences colored red.

### Supplementary Table S3.

Primers for the transcriptions of *S. cerevisiae* tRNA<sup>Phe</sup> transcript, tRNA<sup>Trp</sup> transcript and tRNA<sup>Phe</sup> mutants

---

#### tRNA<sup>Phe</sup> transcript

##### Forward

5'-GGGTAATACGACTCACTATAGCGGATTTAGCTCAGTTGGGAGAGCGC  
CAGACTGAAGATCTGGAGGTC-3'

##### Reverse

5'-TGGTGCGAATTCTGTGGATCGAACACAGGACCTCCAGATCTTCAGTC TGG-3'

#### tRNA<sup>Trp</sup> transcript

##### Forward

5'-GGGTAATACGACTCACTATAGAAGCGGTGGCTCAATGGTAGAGCTTT  
CGACTCCAAATC-3'

##### Reverse

5'-TGGTGAAACGGACAGGAATTGAACCTGCAACCCTTCGATTTGGAGTC  
GAAAGCTCTAC-3'

#### G34A

##### Forward

5'-GGGTAATACGACTCACTATAGCGGATTTAGCTCAGTTGGGAGAGCGC  
CAGACTAAAGATCTGGAGGTC-3'

##### Reverse

5'-TGGTGCGAATTCTGTGGATCGAACACAGGACCTCCAGATCTTTAGTC TGG-3'

#### G34C

##### Forward

5'-GGGTAATACGACTCACTATAGCGGATTTAGCTCAGTTGGGAGAGCGC C  
AGACTCAAGATCTGGAGGTC-3'

##### Reverse

5'-TGGTGCGAATTCTGTGGATCGAACACAGGACCTCCAGATCTTGAGTC TGG-3'

#### G34U

##### Forward

5'-GGGTAATACGACTCACTATAGCGGATTTAGCTCAGTTGGGAGAGCGC  
CAGACTTAAGATCTGGAGGTC-3'

Reverse

5'-TGGTGCGAATTCTGTGGATCGAACACAGGACCTCCAGATCTT**A**AGTC TGG-3'

**Δ D-arm**

Forward

5'-**TAATACGACTCACTATAGCGGATTTAGCGCCAGACTGAAGATCTGGA**  
GGTCCTGTGT-3'

Reverse

5'-TGGTGCGAATTCTGTGGATCGAACACAGGACCTCCAGATCTT-3'

**Δ T-arm**

Forward

5'-**TAATACGACTCACTATAGCGGATTTAGCTCAGTTGGGAGAGCGCCAG** ACTGA-3'

Reverse

5'-TGGTGCGAATTCGGACCTCCAGATCTTCAGTCTGGCGCTCTCCC-3'

**Δ anticodon-arm**

Forward

5'-**TAATACGACTCACTATAGCGGATTTAGCTCAGTTGGGAGAGCGCGAG**  
GTCCTGTGT-3'

Reverse

5'-TGGTGCGAATTCTGTGGATCGAACACAGGACCTCGCGCTCTCC-3'

**Δ aminoacyl-stem**

Forward

5'-**TAATACGACTCACTATAGGTAGCTCAGTTGGGAGAGCGCCAGACTGA**  
AGATCTGGAG-3'

Reverse

5'-CTGTGGATCGAACACAGGACCTCCAGATCTTCAGTCTGGCGC-3'

---

The bold show a promoter that is recognized by T7 RNA polymerase. Mutational site colored red.

**Supplementary Table S4.** SAS data acquisition, sample details, data analysis, modelling fitting and software used.

| <b>A. Sample details</b>                                                 |                                                                                           |                                    |
|--------------------------------------------------------------------------|-------------------------------------------------------------------------------------------|------------------------------------|
|                                                                          | Trm7-Trm734                                                                               | Trm7-Trm734-tRNA <sup>Phe</sup>    |
| Organism                                                                 | <i>S. cerevisiae</i>                                                                      |                                    |
| Source (Catalogue No. or reference)                                      | <i>E.coli</i> expressed                                                                   |                                    |
| Uniprot ID + (residues, tRNA)                                            | P38238 (1-310), Q08924 (1-1013)                                                           |                                    |
| Extinction coefficient ( $A_{280\text{nm}}$ , Abs <sub>0.1%</sub> (w/v)) | 1.143                                                                                     | 1.394                              |
| Partial specific volume $\bar{v}$ (cm <sup>3</sup> g <sup>-1</sup> )     | 0.737                                                                                     | 0.714                              |
| mean scattering contrast $\Delta\bar{\rho}$ (cm <sup>-2</sup> )          | $2.683 \times 10^{10}$                                                                    | $3.019 \times 10^{10}$             |
| $M$ from chemical composition (Da)                                       | 147000                                                                                    | 183000                             |
| concentration, (mg ml <sup>-1</sup> )                                    | 0.465, 0.62, 1.24, 1.86,<br>2.48, 3.10                                                    | 1.22, 244, 3.66, 4.88, 6.10        |
| Concentration values measured and method                                 | Blood ford                                                                                |                                    |
| Solvent composition                                                      | 50 mM HEPES-KOH, 200 mM, KCl, 5 % v/v glycerol,<br>10 mM $\beta$ -mercaptoethanol, pH 8.0 |                                    |
| <b>B. SAS data collection parameters</b>                                 |                                                                                           |                                    |
| Source, instrument                                                       | Photon Factory<br>BL-10C                                                                  | SPring 8<br>BL45XU                 |
| Wavelength (Å)                                                           | 1.0                                                                                       | 1.0                                |
| Camera Length (mm)                                                       | 2050.38                                                                                   | 1987.86                            |
| Beam geometry (μm)                                                       | V350 × H550                                                                               | V150 × H350                        |
|                                                                          | Bent cylindrical mirror<br>+ 2 slits + 1 pinhole                                          | K-B mirror + 2slits<br>+ 1 pinhole |
| $q$ -measurement range (Å <sup>-1</sup> )                                | 0.0095-0.4094                                                                             | 0.0071-0.4141                      |
| Absolute scaling method                                                  | Comparison with scattering from pure H <sub>2</sub> O                                     |                                    |
| Basis for normalization to constant counts                               | Normalized to incident intensity by $\mu$ ion chamber                                     |                                    |
| Method for monitoring radiation damage                                   | data frame-by-frame comparison                                                            |                                    |
| Exposure time, number of exposures                                       | 10 sec, 40 images                                                                         | 1 sec, 20 images                   |
| Sample configuration including path length                               | 1.25 mm                                                                                   | 3 mm                               |
| Sample temperature (K)                                                   | 293                                                                                       | 293                                |

---

**C. Software employed for SAS data reduction, analysis and interpretation**

---

|                                               |                                    |
|-----------------------------------------------|------------------------------------|
| SAS data processing                           | <i>SAngher</i>                     |
| Extrapolation                                 | <i>PRIMUSqt</i>                    |
| Calculation of $\epsilon$ from sequence       | <i>ExPASy</i> (1)                  |
| Calculation of M.W. from scattering           | <i>SAXSMoW</i> (v2.1) <sup>8</sup> |
| Calculation of $\Delta\bar{\rho}$ values      | <i>MULCh</i> (2)                   |
| Calculation of $\bar{v}$ values               |                                    |
| Basic analyses: (Guinier, P(r), Porod Volume) | <i>PRIMUSqt</i>                    |
| Rigid body modelling with flexible linkers    | <i>CORAL</i>                       |

---

**D. Structural parameters**

---

|                                                  | Trm7-Trm734              | Trm7-Trm734-tRNA <sup>Phe</sup> |
|--------------------------------------------------|--------------------------|---------------------------------|
| Guinier Analysis                                 |                          |                                 |
| $I(0)$ (cm <sup>-1</sup> )                       | 0.19 +/- 0.0003          | 0.27 +/- 0.0003                 |
| $R_g$ (Å)                                        | 37.9 +/- 0.8             | 40.9 +/- 0.2                    |
| $Q$ -range (Å <sup>-1</sup> )                    | 0.0095-0.034             | 0.0071-0.032                    |
| $P(r)$ analysis                                  |                          |                                 |
| $I(0)$ (cm <sup>-1</sup> )                       | 0.19 +/- 0.0001          | 0.27 +/- 0.0005                 |
| $R_g$ (Å)                                        | 37.67 +/- 0.03           | 40.98 +/- 0.11                  |
| $D_{max}$ (Å)                                    | 130                      | 155                             |
| $Q$ -range (Å <sup>-1</sup> )                    | 0.01265 - 0.32383        | 0.01957 - 0.32424               |
| $M$ from $I(0)$ (ratio to expected value)        | 158819 (1.08)            | 177332 (0.97)                   |
| $M$ compared with Ovalbmin                       | 151430 (1.03)            | 208060 (1.14)                   |
| $V_p$ , $M$ from $V_p$ (ratio to expected value) | 218000,<br>136250 (0.93) | 254000,<br>158750 (0.87)        |

---

---

**E. Shape modelling results**

---

|                                                                | Trm7-Trm734           |
|----------------------------------------------------------------|-----------------------|
| <i>DAMMIF</i> (default parameters, 20 calculations)            |                       |
| <i>Q</i> -range for fitting                                    | 0.01265 - 0.32383     |
| Symmetry/anisotropy assumptions                                | <i>P</i> 1, none      |
| NSD (standard deviation), No of clusters                       | 1.05 (0.06), 1        |
| $\chi^2$ range                                                 | 1.909 - 1.957         |
| Model <i>M</i> estimate ( $\times 0.5 V_{\text{model}}$ ) (Da) | 137000                |
| Model resolution (Å)                                           | 48 +/- 4              |
| <i>DAMMIN</i> (default parameters)                             |                       |
| <i>Q</i> -range for fitting                                    | 0.01265 - 0.32383     |
| Symmetry/anisotropy assumptions                                | <i>P</i> 1            |
| $\chi^2$ value, <i>CORMAP</i> <i>P</i> value                   | 1.92, 0.03            |
| Constant adjustment to intensities                             | $2.38 \times 10^{-4}$ |

---

**F. Rigid body modelling**

---

|                                    | Trm7-Trm734                                        |
|------------------------------------|----------------------------------------------------|
| <i>CORAL</i> (default parameters)  |                                                    |
| <i>Q</i> -range for all modelling  | 0.01265 - 0.32383                                  |
| Symmetry assumptions               | <i>P</i> 1                                         |
| $\chi^2$ value, <i>P</i> value     | 2.18, 0.00                                         |
| Constant adjustment to intensities | $3.04 \times 10^{-4}$                              |
| Domain coordinates                 | Trm7 / Trm734                                      |
| Domain contacts                    | 12 Å for Trm734/Trm7<br>(residue: 111-112/138-140) |
| regions of presumed flexibility    | Residue 1-8, 260-310 of Trm7                       |

---

**F. Data and model deposition IDs**

---

|             |         |
|-------------|---------|
| Trm7-Trm734 | SASDDR3 |
|-------------|---------|

---



## Supplementary Table S5.

Interface residues of Trm7 interacted with BPA and BPC in Trm734.

| Trm7 | Accessible surface area (Å <sup>2</sup> ) | Buried surface area (Å <sup>2</sup> ) | Trm734 domain |
|------|-------------------------------------------|---------------------------------------|---------------|
| R14  | 147.16                                    | 0.58                                  | BPC           |
| L84  | 115.82                                    | 28.18                                 | BPA           |
| T101 | 87.05                                     | 0.34                                  | BPA           |
| H102 | 121.87                                    | 1.59                                  | BPA           |
| P127 | 60.15                                     | 11.16                                 | BPA           |
| D128 | 136.84                                    | 10.7                                  | BPA           |
| V129 | 105.08                                    | 16.6                                  | BPA           |
| T130 | 93.94                                     | 84.58                                 | BPA           |
| G131 | 48.63                                     | 23.19                                 | BPA           |
| L132 | 110.87                                    | 92.35                                 | BPA           |
| H133 | 110.46                                    | 81.21                                 | BPA           |
| D134 | 87.76                                     | 68.2                                  | BPA           |
| L135 | 77.14                                     | 53.17                                 | BPA           |
| E137 | 11.4                                      | 0.12                                  | BPA           |
| Y138 | 132.27                                    | 96.46                                 | BPA           |
| V139 | 38.67                                     | 28.79                                 | BPA           |
| Q142 | 91.33                                     | 68.54                                 | BPA           |
| L143 | 54.64                                     | 2.0                                   | BPA           |
| R167 | 103.06                                    | 98.26                                 | BPC           |
| G168 | 25.77                                     | 22.11                                 | BPC           |
| R169 | 171.21                                    | 146.18                                | BPC           |
| I171 | 19.9                                      | 16.91                                 | BPC           |
| D172 | 29.52                                     | 16.46                                 | BPC           |
| M173 | 34.47                                     | 14.96                                 | BPC           |
| Y175 | 16.11                                     | 6.92                                  | BPC           |
| C187 | 3.49                                      | 0.5                                   | BPC           |
| K189 | 50                                        | 22.93                                 | BPC           |
| R191 | 130.6                                     | 25.32                                 | BPC           |

|       |        |         |     |
|-------|--------|---------|-----|
| G195  | 78.11  | 11.21   | BPC |
| T196  | 128.45 | 33.49   | BPC |
| L198  | 84.85  | 53.74   | BPC |
| N233  | 202.11 | 152.65  | BPA |
| K234  | 176.45 | 10.23   | BPA |
| C236  | 75.67  | 34.25   | BPA |
| S238  | 48.26  | 20.12   | BPA |
| D239  | 90.5   | 49.19   | BPA |
| S242  | 36.77  | 18.58   | BPA |
| E246  | 66.27  | 10.75   | BPA |
| E247  | 115.3  | 31.46   | BPA |
| R249  | 114.13 | 44.85   | BPC |
| I251  | 158.65 | 91.97   | BPC |
| A252  | 15.59  | 2.45    | BPC |
| F254  | 101.27 | 83.98   | BPC |
| M255  | 64.63  | 6.86    | BPC |
| A256  | 54.08  | 34.58   | BPC |
| Total | 3826.3 | 1728.67 |     |

---

## Supplementary Table S6.

Interface residues of Trm734 interacted with Trm7.

| Trm734 | Trm734 domain | Accessible surface area (Å <sup>2</sup> ) | Buried surface area (Å <sup>2</sup> ) |
|--------|---------------|-------------------------------------------|---------------------------------------|
| P9     | Linker        | 6.36                                      | 2.68                                  |
| L11    | BPA           | 23.34                                     | 14.47                                 |
| Y47    | BPA           | 94.71                                     | 45.51                                 |
| N48    | BPA           | 27.96                                     | 22.99                                 |
| K49    | BPA           | 35.38                                     | 16.6                                  |
| H51    | BPA           | 65.72                                     | 33.78                                 |
| A66    | BPA           | 13.31                                     | 8.17                                  |
| R67    | BPA           | 113.34                                    | 72.72                                 |
| I89    | BPA           | 85.45                                     | 7.6                                   |
| S91    | BPA           | 88.63                                     | 33.36                                 |
| D92    | BPA           | 44.69                                     | 23.2                                  |
| W93    | BPA           | 111.05                                    | 92.35                                 |
| C111   | BPA           | 15.63                                     | 12.45                                 |
| Y112   | BPA           | 67.3                                      | 53.3                                  |
| N113   | BPA           | 8.07                                      | 1.49                                  |
| K114   | BPA           | 73.28                                     | 28.19                                 |
| S129   | BPA           | 33.54                                     | 2.64                                  |
| L130   | BPA           | 44.51                                     | 15.67                                 |
| G131   | BPA           | 74.23                                     | 0.48                                  |
| G132   | BPA           | 70.91                                     | 20.32                                 |
| E133   | BPA           | 159.29                                    | 9.87                                  |
| R134   | BPA           | 155.78                                    | 86.33                                 |
| S135   | BPA           | 24.28                                     | 0.73                                  |
| I136   | BPA           | 91.27                                     | 20.9                                  |
| L137   | BPA           | 6.38                                      | 0.37                                  |
| Y138   | BPA           | 117.15                                    | 73.78                                 |
| M158   | BPA           | 169.22                                    | 26.6                                  |
| F183   | BPA           | 41.94                                     | 24.05                                 |

|      |     |        |       |
|------|-----|--------|-------|
| R223 | BPA | 82.09  | 53.71 |
| W225 | BPA | 32.28  | 14.56 |
| E241 | BPA | 13.23  | 0.12  |
| K272 | BPA | 64.01  | 8.87  |
| S273 | BPA | 4.72   | 2.82  |
| W275 | BPA | 70.29  | 53.26 |
| N291 | BPA | 23.13  | 10.28 |
| E656 | BPC | 26.76  | 5.77  |
| R658 | BPC | 94.55  | 24.69 |
| E685 | BPC | 57.3   | 6.62  |
| D763 | BPC | 163.87 | 0.73  |
| F817 | BPC | 47.21  | 3.75  |
| T835 | BPC | 42.08  | 11.44 |
| D836 | BPC | 50.55  | 3.5   |
| Q882 | BPC | 162.52 | 73.42 |
| S883 | BPC | 41.08  | 27.08 |
| K886 | BPC | 57.87  | 8.03  |
| D906 | BPC | 65.33  | 53.64 |
| D907 | BPC | 27.48  | 20.32 |
| N908 | BPC | 40.91  | 34.36 |
| A933 | BPC | 85.08  | 29.75 |
| A935 | BPC | 8.91   | 7.74  |
| S936 | BPC | 90.74  | 84.17 |
| S937 | BPC | 36.06  | 35.45 |
| T938 | BPC | 25.54  | 10.54 |
| V956 | BPC | 51.97  | 44.18 |
| D957 | BPC | 26.71  | 25.41 |
| Q958 | BPC | 56.8   | 40.66 |
| R961 | BPC | 23.55  | 1.32  |
| R977 | BPC | 126.73 | 51.53 |
| T978 | BPC | 4.45   | 0.12  |
| A981 | BPC | 30.63  | 27.28 |

|       |     |         |         |
|-------|-----|---------|---------|
| D982  | BPC | 59.85   | 36.39   |
| V1006 | BPC | 25.73   | 19.75   |
| Total |     | 3682.73 | 1581.86 |

---

## Legends to Supplementary Figures

**Supplementary Figure S1.** SDS-PAGE (12.5%) of the purified recombinant Trm7-Trm732.

The gel was stained with Coomassie Brilliant Blue.

**Supplementary Figure S2.** Two-dimensional thin-layer chromatographic analysis of methylated nucleosides. The  $^{14}\text{C}$ -methylated *Saccharomyces cerevisiae* tRNA<sup>Phe</sup> transcript modified with Cm32 and m<sup>1</sup>G37 by Trm7-Trm734 was digested with Nuclease P1 at 37°C for 12 h. The nucleotides were separated by two-dimensional thin-layer chromatography using the following two solvent systems: (A) first dimension, isobutyric acid/concentrated ammonia/water, 66:1:33, v/v; second dimension, isopropyl alcohol/HCl/water, 70:15:15, v/v; (B) first dimension, isobutyric acid/concentrated ammonia/water, 66:1:33, v/v/v; second dimension, 0.1 M Sodium phosphate (pH 6.8), ammonium sulfate, n-propanol, 100:60:2, v/w/v, and then the  $^{14}\text{C}$ -methylated nucleotides were detected by autoradiography. The standard markers (pA, pG, pC and pU) were detected by UV254nm irradiation.  $^{14}\text{C}$ -pGm spots are enclosed by red dotted circles.

**Supplementary Figure S3.** (A) *Left*, ribbon models of two Trm7-Trm734-SAM complexes in an asymmetric unit of the crystal belonging to the monoclinic  $C2$  space group. The Trm7, Trm734 BPA, BPB and BPC are colored red, green, blue and yellow, respectively. *Right*, line diagrams of the structure in left panels. One Trm7-Trm734 is colored magenta, another is colored cyan. Ball models show the HEPES (cyan) and sulfate (orange). (B) Ribbon diagram of the heterodimer of Trm7-Trm734-SAM complex including one HEPES and five sulfates.

**Supplementary Figure S4.** Close-up view of the large space (dotted red-circle) consisting of interacting Trm7-Trm734 molecules in the crystal with non-crystallographic symmetry.

**Supplementary Figure S5.** Profiles contributed to SAXS experiments. Black and blue lines are attributed to Trm7-Trm734 and Trm7-Trm734-tRNA<sup>Phe</sup> respectively. (A)  $\log I(Q)$  versus  $Q$  plots. Red line superposed to the black line is corresponding to the theoretical scattering curve calculated from rigid body model of Trm7-Trm734 obtained by *CORAL*. These  $\chi^2$  values are 2.18 for Trm7-Trm734. (B) Guinier plots.  $Q \times R_g$  regions shown by continuous lines are

equivalent to  $0.36 < Q \times R_g < 1.30$  for Trm7-Trm734 and  $0.29 < Q \times R_g < 1.27$  for Trm7-Trm734-tRNA<sup>Phe</sup> respectively. (C) Dimensionless Kratky plots. (D) Normalized pair distribution function. These maximum size parameters ( $D_{\max}$ ) are 130 Å for Trm7-Trm734 and 155 Å for Trm7-Trm734-tRNA<sup>Phe</sup> respectively.

**Supplementary Figure S6.** Topology diagrams of Trm7 (A) and Trm734 (B). The  $\alpha$  helices,  $3_{10}$  helix, and  $\beta$  strands are labeled as  $\alpha$ ,  $3_{10}$ , and  $\beta$ , respectively. The N- and C-terminal ends are indicated as N and C, respectively. The four antiparallel  $\beta$  strands of one WD40 blade are labeled as a, b, c, and d, respectively, in the three WD40 domains (BPA, green; BPB, blue; and BPC, yellow) of Trm734. The WD40 blades in the WD40 domain are numbered from 1 to 7.

**Supplementary Figure S7.** Structural information-based amino acid sequence alignments of *S. cerevisiae* Trm7, *Kluyveromyces marxianus* Trm7, *S. pombe* Trm7, *Arabidopsis thaliana* Trm7 and *H. sapiens* FTSJ1 and *E. coli* RlmE. Identical and similar residues are boxed. Secondary structure of the *S. cerevisiae* Trm7 and *E. coli* RlmE are indicated above and below the alignments. The position of A26P mutation in *H. sapiens* FTSJ1, which causes NSXLID, is



shown by black-arrow. This figure was created using ClustalW (15) and ESPript (16). The conserved residues responsible for interaction with SAM are colored green. The catalytic residues for methylation are colored blue labeled with blue-circles.

**Supplementary Figure S8.** Structural information-based amino acid sequence alignments of *S. cerevisiae* Trm734, *S. pombe* Trm734 and *H. sapiens* WD8. Identical and similar residues are boxed. Each secondary structures of the BPA (green), BPB (blue) and BPC (yellow) domains of *S. cerevisiae* Trm734 are indicated above the alignments. The minimal unit of the WD40 domain constitutes a four-stranded anti-parallel  $\beta$ -sheet (a, b, c, and d). This figure was created using ClustalW (15) and ESPript (16).

**Supplementary Figure S9.** (A) Line diagram of the superimposed C $\alpha$  atoms of BPA in Trm734 (green) onto those of BPC in Trm734 (yellow) (r.m.s.d = 2.29 Å for 249 aligned residues). (B) Line diagram of superimposed C $\alpha$  atoms of BPA in Trm734 (green) onto those of BPB in Trm734 (blue) (r.m.s.d = 3.39 Å for 211 aligned residues). (C) Line diagram of superimposed C $\alpha$  atoms of BPB in Trm734 (green) onto those of BPC in Trm734 (yellow)

(r.m.s.d = 3.14 Å for 262 aligned residues).

**Supplementary Figure S10.** (A) Schematic diagram of detailed interactions between the residues of Trm7 and SAM. (B) Surface model of the SAM bound form of Trm7-Trm734. The degrees of conservation are represented by a gradient color between conserved (purple) and variable (cyan). White indicates areas in which conservation and variability average out. (C) Stick diagram of the four catalytic residues and SAM in *S. cerevisiae* Trm7 (green) superimposed onto those in *E. coli* RlmE (cyan).

**Supplementary Figure S11.** (A) Close-up view of the interacting residues (stick models) between Trm7 (red) and BPA of Trm734 (green). The dotted lines show hydrogen bonds and salt bridges between Trm7 and BPA of Trm734. Detailed distances for the interaction are tabulated in Table 2A. (B) Close-up view of the interacting residues (stick models) between Trm7 (red) and BPC of Trm734 (yellow). The dotted lines show hydrogen bonds and salt bridges between Trm7 and BPC of Trm734. Detailed distances for the interaction are tabulated in Table 2B.

**Supplementary Figure S12.** (A) Ribbon diagram of the overall structure of human DDB1-DDB2-DNA complex (PDBID = 3E11). The three WD40 domains of DDB1-BPA, DDB1-BPB and DDB1-BPC are colored red, purple and orange, respectively. The CTD of the

DDB1 and WD40 domain of DDB2 are colored gray and green, respectively. The double stranded DNA bound to DDB2 is shown by a stick model. (B) Surface model of DDB1 structure and its cartoon model. The shallow cleft consisting of DDB1-BPA and DDB1-BPC (dotted black-circle) is responsible for interacting with the DDB2.

**Supplementary Figure S13.** (A) Cloverleaf structure of *Saccharomyces cerevisiae* tRNA<sup>Phe</sup> and four mutant tRNA<sup>Phe</sup> transcripts ( $\Delta$ D-arm,  $\Delta$ T-arm,  $\Delta$ anticodon-arm and  $\Delta$ aminoacyl-stem) (B) The autoradiogram of the same gel, shown in panel A.

**Supplementary Figure S1**

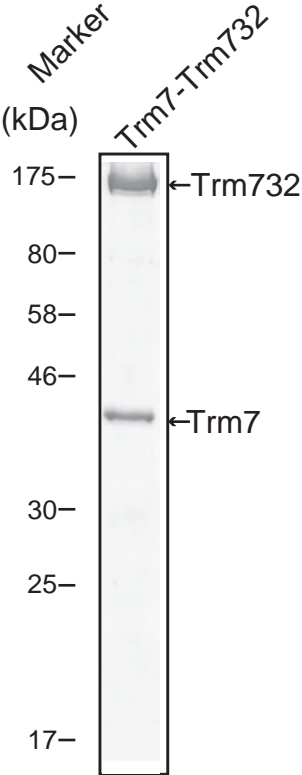

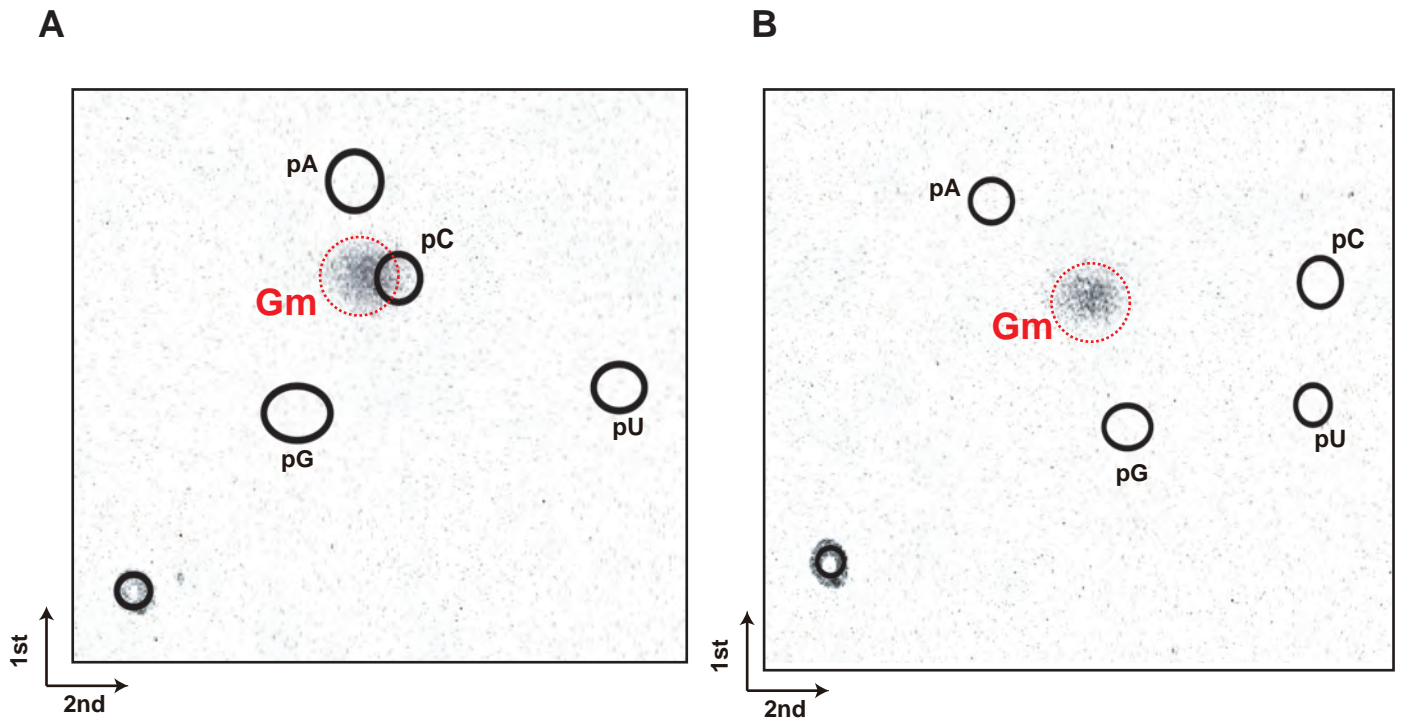

Supplementary Figure S2

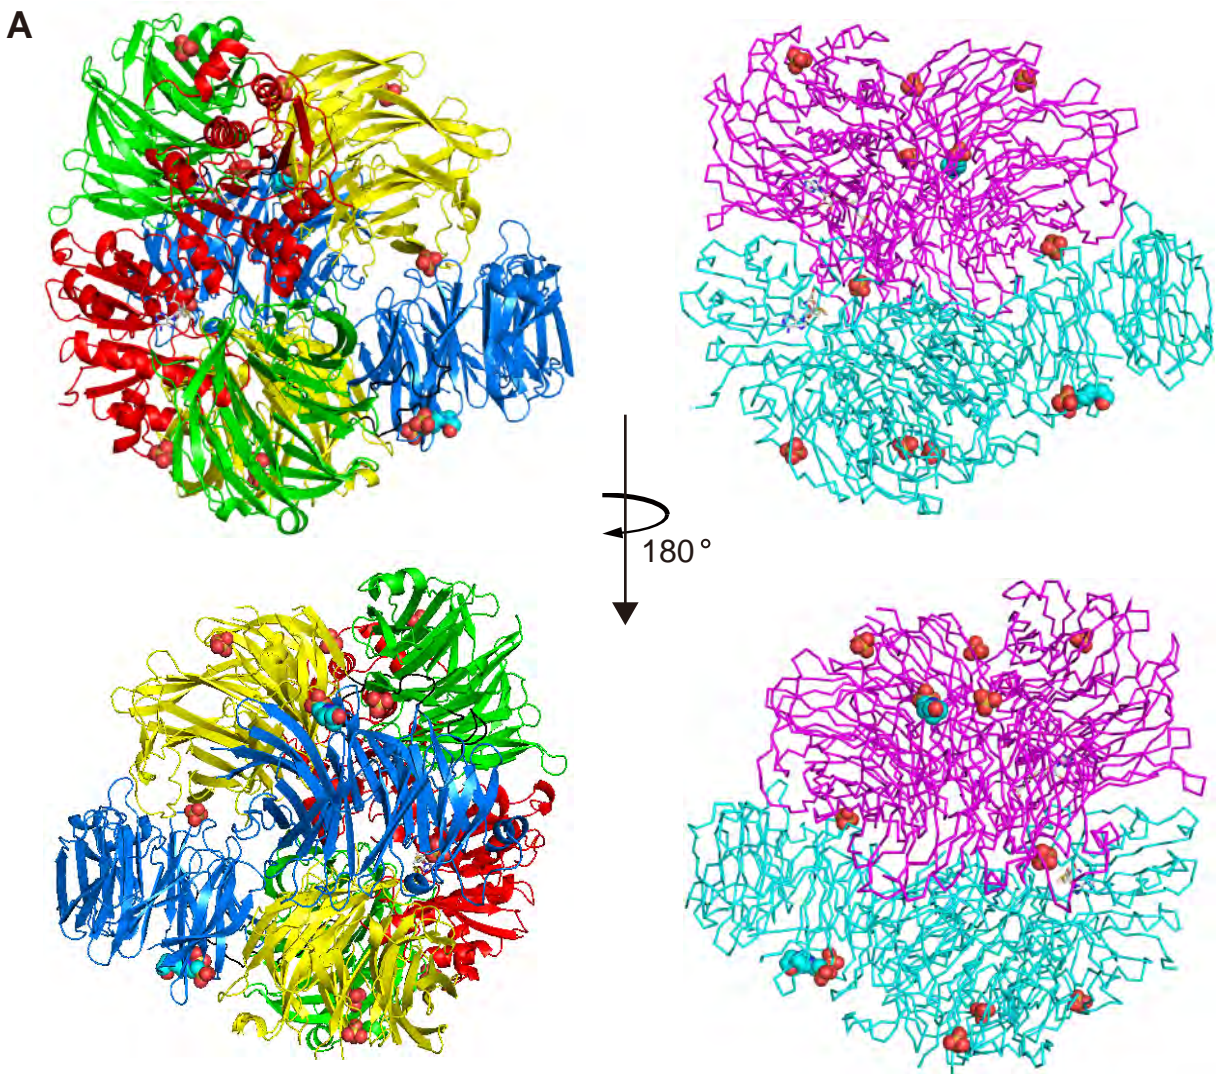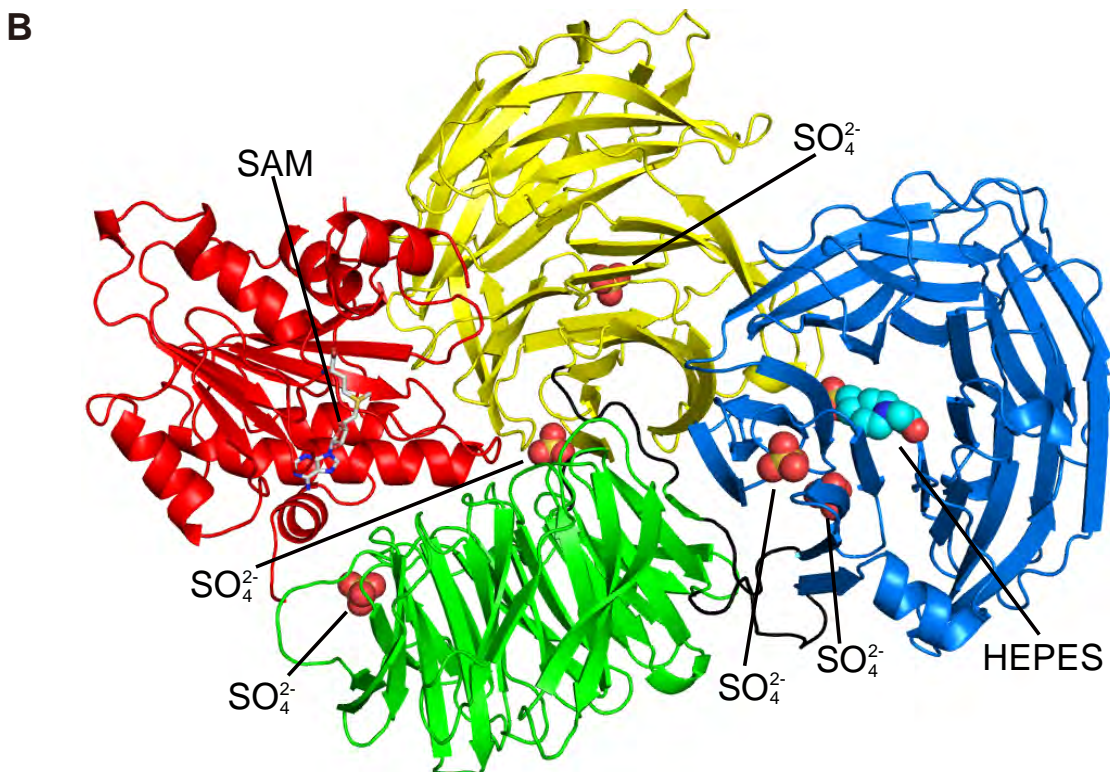

Supplementary Figure S3



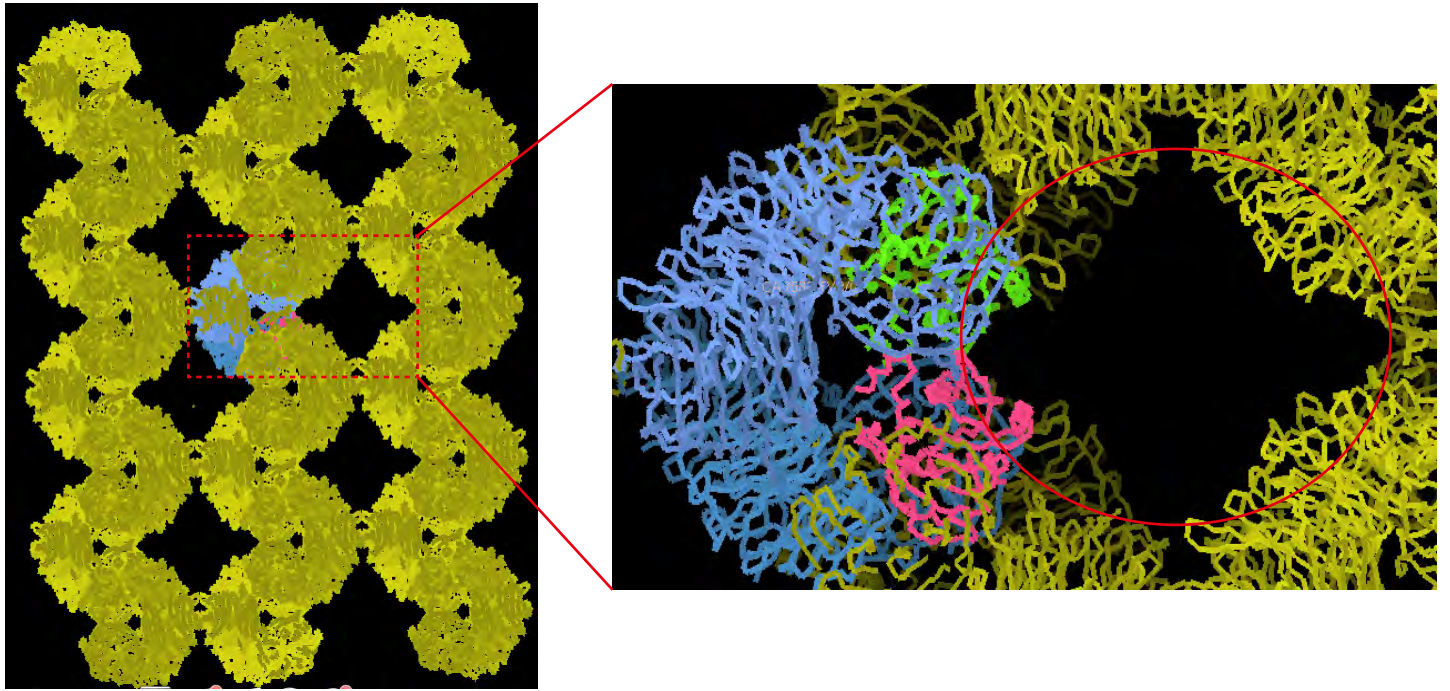

**Supplementary Figure S4**

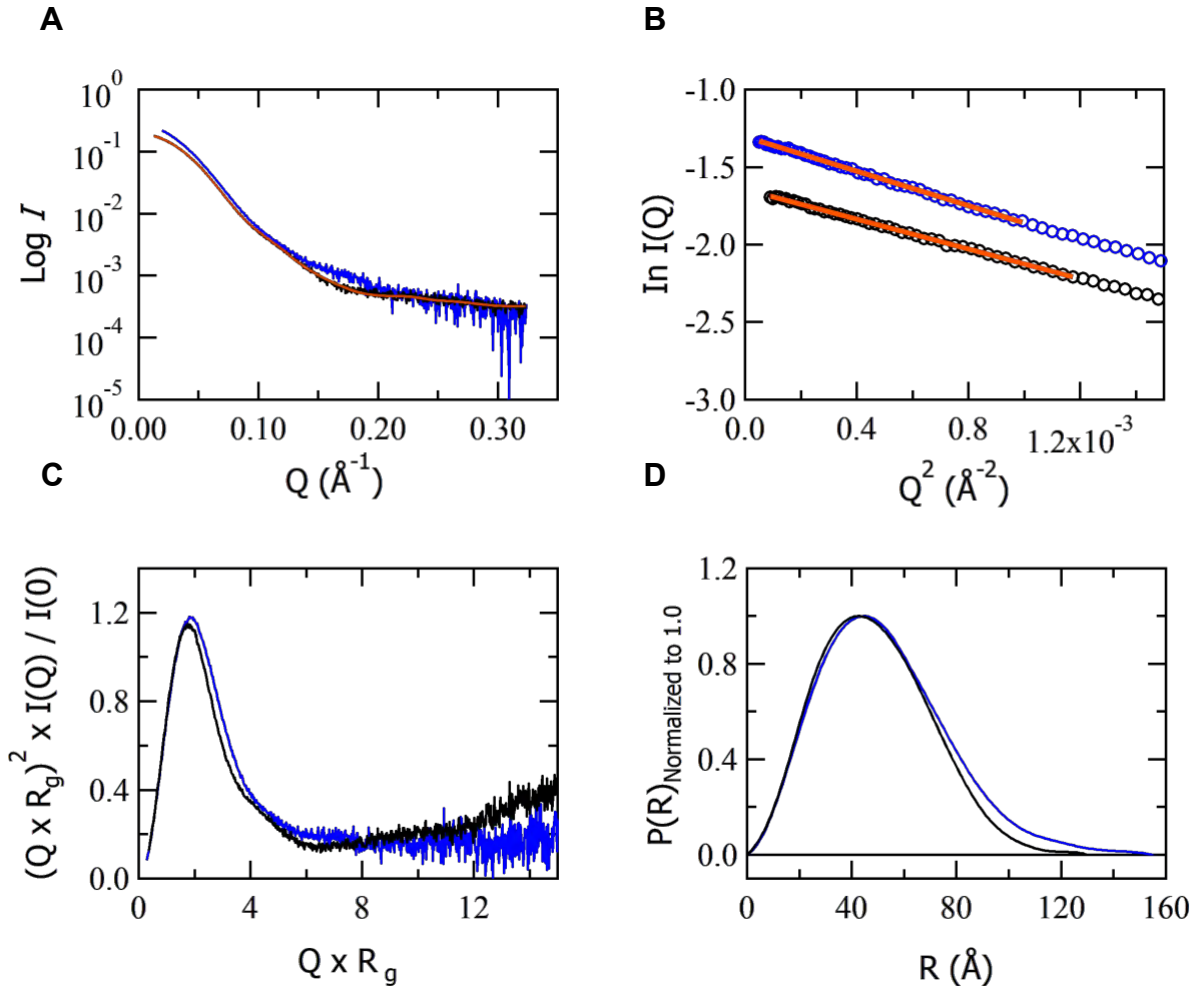

Supplementary Figure S5



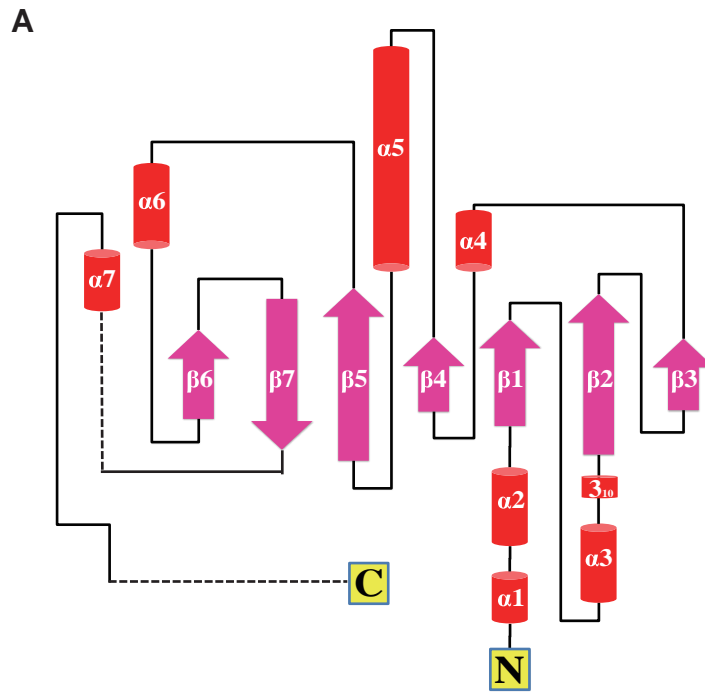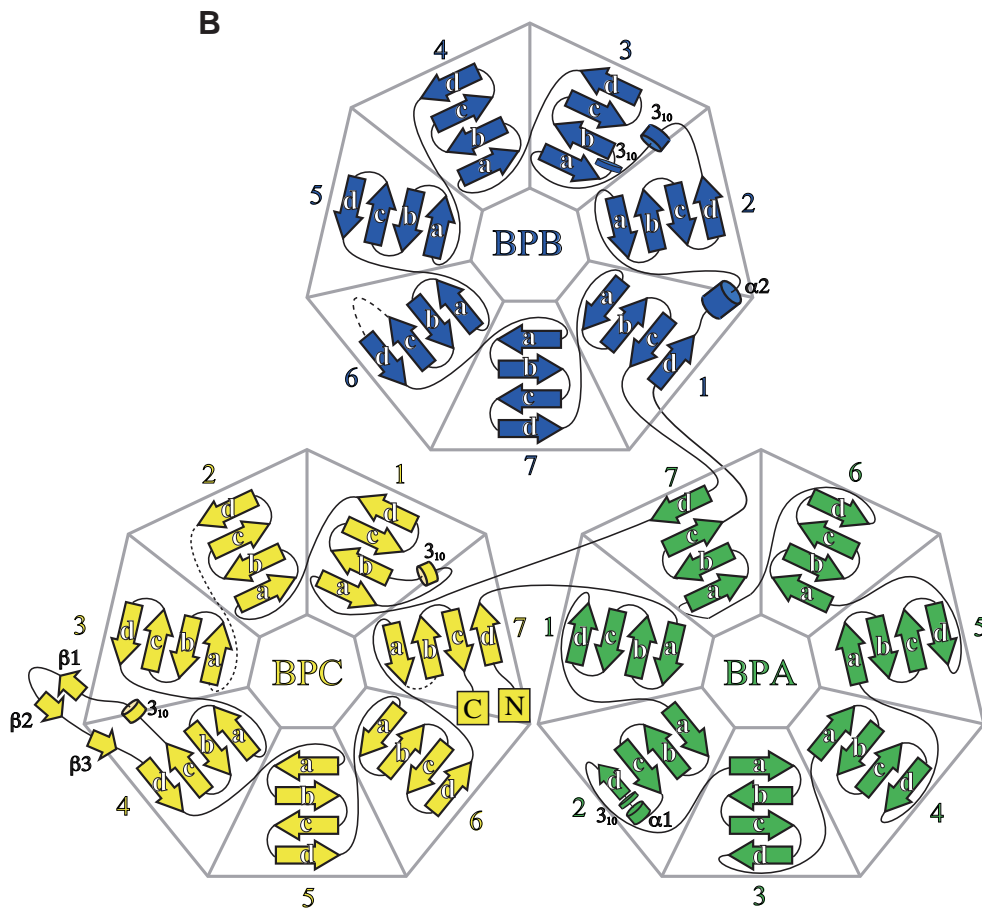

Supplementary Figure S6

### A26P NSXLID

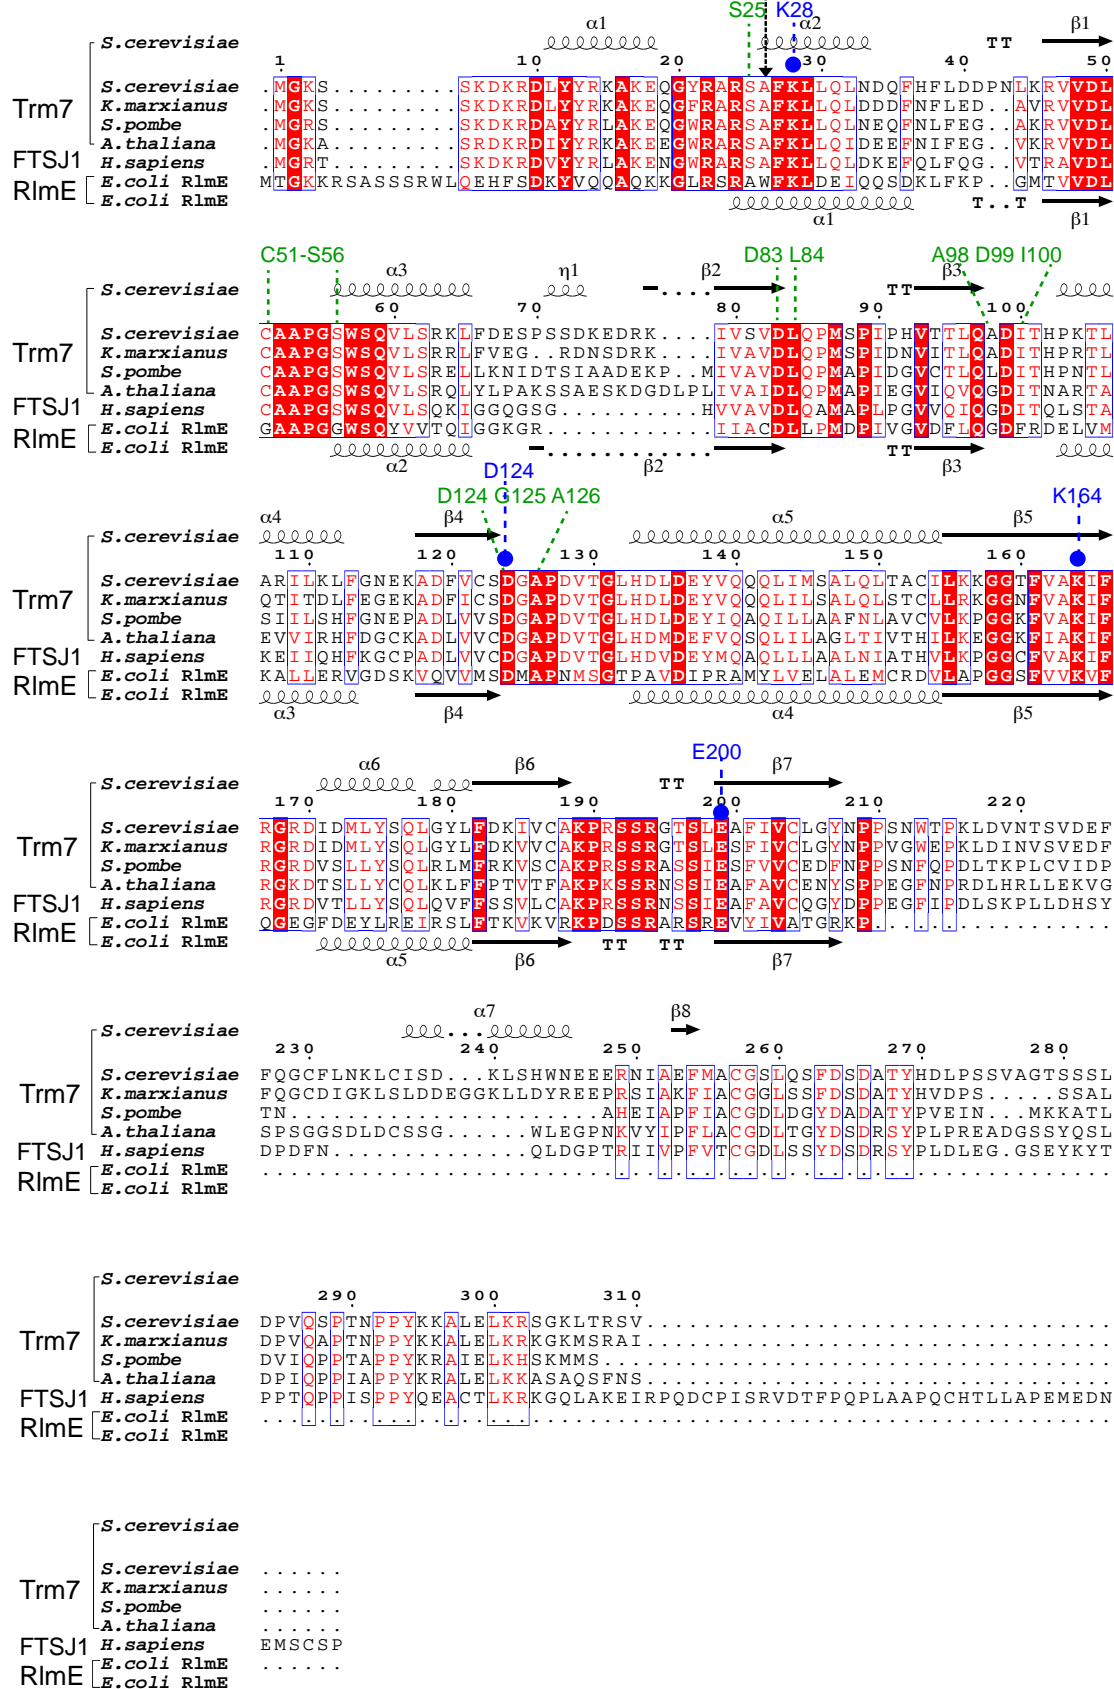

Supplementary Figure S7

# Supplementary Figure S8

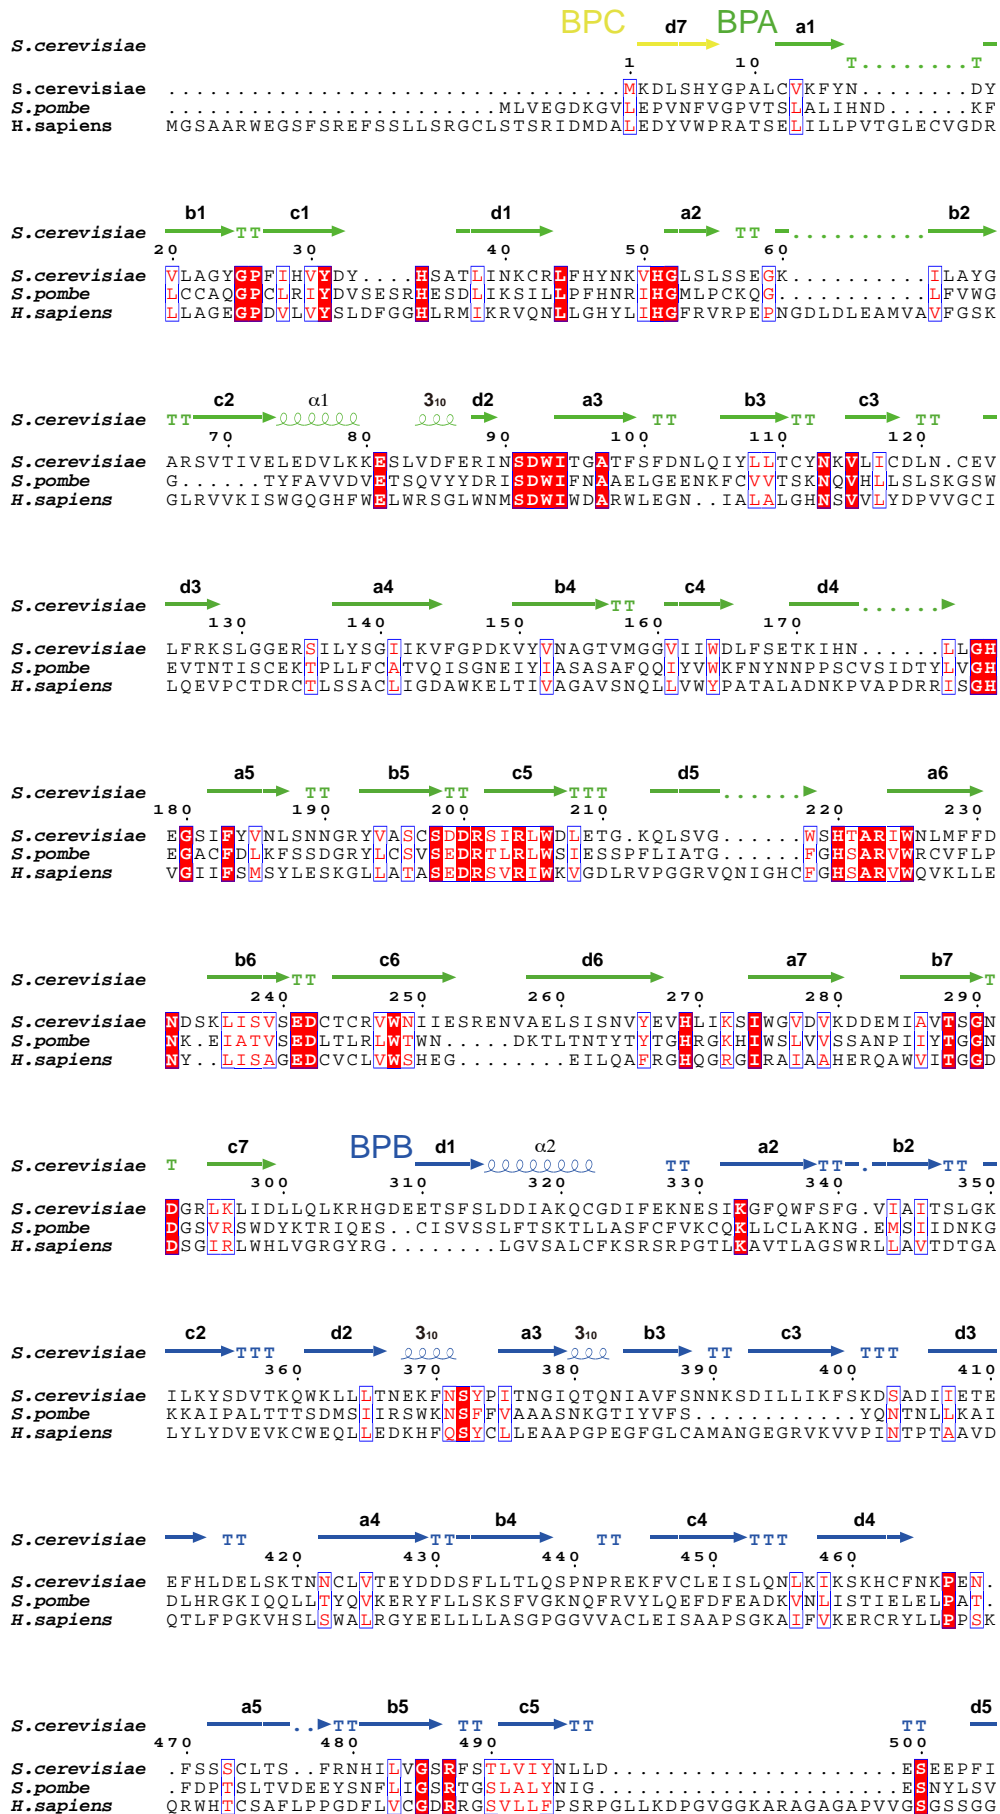

*S.cerevisiae*      a6      b6      c6      d6  
 510      520      530      540      550      560

*S.cerevisiae*    IRR LSPGDTT **TSI**EFVED**KD**NSAVF**S**V TNRD**G****Y**VVFIELTKNSLEEGPYR**LS**YKVLHNSK  
*S.pombe*          WRR IHEFDAL **SSI**HIKSS**KR**DYLLI**Q**TVGRD**G****Y**VNLF S IPRVEKSAVP**QE****LC**SKKCCDG.  
*H.sapiens*        GNAFTGLGPV **STL**PSP LH**KQ**GVTSV**T**CHGGY**V**YTTGRDGAYYQLFVRD**Q****L**QPVLQRKSC

*S.cerevisiae*      a7      b7      c7      d7      TT      a1  
 570      580      590      600      610      620

*S.cerevisiae*    MMKGF**L**EGAFFNSKGEYI**TY****GFK**S**S**L**FY**LYNET**N**CYE**L**ASEV**CGG**S**HR**L**W**NLAKITDGHV  
*S.pombe*          ILSGG**L**CKK LKNGKENQ**VW****GF**HAS**N**F**FL**RDE**T**NET**N**V**FF**ID**CGG**S**HR**P**W**AFSMEMDIQS  
*H.sapiens*        RGMNW**L**AGLRIVPDGSMV**IL****GF**HAN**E**F**V**WNPR**S**HEK**L**HIVN**CGG**G**HR**S**W**AFSDTEAAMA

*S.cerevisiae*      b1      c1      BPA      d7      BPC      a1  
 630      640      650      660

*S.cerevisiae*    L**MY**I**K**ASRFH**L**RKIYNSIVP...ET**EN****G**V**H**GRE**I**RD**I**S...IC**P**VSN  
*S.pombe*          F**AS**Y**R**ANQ**LY**I**Y**STALNLLQRNS**V**L**Q**N**GL**HGRE**I**RAMD...F**N**P**S**..  
*H.sapiens*        F**AY**L**K**DGDV**ML**Y**LR**ALGGCT**RP**H**VI**L**RE****GL**HGRE**I**TC**V**KRVGTITLGP**EY**GV**PS**FM**Q**ED**DL**

*S.cerevisiae*      3<sub>10</sub>      b1      c1      d1  
 670      680      690      700      710

*S.cerevisiae*    TNTDNFKDGH**I**F**C**T**A****S**ED**T****I**K**L**GYFN**NR****T**C**K**V**Q**NFW**T**Q**R**K**H**V**S**...**G**  
*S.pombe*          ...GD**LL**S**G**SE**D**T**K**V**T**L**E**F**Q**.**S****NC****N**I**I**PLNS**V**K**F****H****S**...**G**  
*H.sapiens*        EP**G**SE**GP**DL**TD****I****V**I**T**C**S**ED**T****T**V**C**L**AL**P**TT****T**C**S**A**HAL**T**AV**C**N****H****I**S**S**VR**AV**AV**WG**I**GP****G**

*S.cerevisiae*      a2      b2      c2      d2  
 720      730      740      750

*S.cerevisiae*    L**Q**R**C****Q**FIN**H**KL**M****I**S**S**ARE**EL**FL**W**E**L**NDK**YN**...K**R**PY**MT**I**R**Q**AL**P...  
*S.pombe*          I**Q**SL**T**W**F**S**DD**I**L**F**S**T**G**GLE**EL**N**V**Y**R**L**I**Q**K**PE...AY**L**K**R**IV**HE**K**L**CK**P****N**  
*H.sapiens*        P**Q**DP**Q**PL**T**A**H****V****S**AG**GR**A**EM**H**C**E**S**I**M**V**T**PD**P**ST**PS**RL**ACH**V**M**HL**S**SH**RL**DE**Y**W**D**R**Q**R**N**

*S.cerevisiae*      a3      b3      c3      d3  
 760      770      780      790      800      810

*S.cerevisiae*    ..V**ST**N**NS****D**L**R**IM**DF****V****K**F**I**S**Q**S**G**D..FL**L**V**T**V**Y****S**D**ST****I**K**I**W**H**Y**RE**N**Q**N**K**F**DL**I**M**Q**G**R**Y****K**  
*S.pombe*          K**S**N**K**T**Y**D**GD**L**R**I**T**D**I**S**V**V**K**A**TH**L**G**ER**VL**W**I**N**T**V**Q****S**D**ST****I**K**A**F**T**Y**N**V**D**T**K**Q**L**N**C**I**K**S**W**K**Y****K**  
*H.sapiens*        H**R**M**V**K**VD**P**E****T**R**Y**M**S**L**AV****C**E**L**D**Q**P**GL**G.P**L**V**AA**A**C****S**D**G**A**V**R**L**F**L**L**Q**D**S**G**R**I**L**Q**L**L**A**E**T**F**H****H**

*S.cerevisiae*      a4      b4      c4      3<sub>10</sub>      β1      β2  
 820      830      840      850      860

*S.cerevisiae*    T**C****L**F**N****V**V**F**I**AL**KE...E**LL**V**IS**P**T**D**G**H**L**V**Y**N**IT**E**Y**V**PF**S**VD**P**I**S**G**D**L**V**D**H**K**L**D**A**T**  
*S.pombe*          T**V****CL**V**F**A**E**A**V**I**FG**S...H**LL**V**V**A**S****T**D**G**N**V**A**I**W**NT**F**WR**D**P**Q...  
*H.sapiens*        K**R****CV**L**K**V**H**S**F**T**HE**A**P**N**Q**R**RR****LL****CS**A**A****T**D**G****S**L**A**F**W**D**LT**T**ML**D**H**D**ST**V**L**E**PP**V**D**P**G**...**L**

*S.cerevisiae*      β3      d4      a5      b5      c5  
 870      880      890      900      910      920

*S.cerevisiae*    I**S**N**L**P**AP**V**A**Q**LP****V**H**Q**SG**V****K****S**L**D**Y**V**A**N**A**T**R**T**S**A**T**I**L**T**G**D****DN**G**L**GL**S**N**T****K**L**DD**S**N**K...**V****T**  
*S.pombe*          ..I**E**P**L**I**I**W**I**K**T****V**H**Q**F**CV****K****S**L**N**I**S**R..D**Q**D**V**L**T**I**ST**G**DD**G**A**I**S**R**S**I**L**L**E**Q**I**S**EN**S**V**V  
*H.sapiens*        P**Y**R**L**G**T**P**S**L**T**L**Q****A**H**S****CG**I**N**S**L**H**T**L**P**.T**R**E**G**H**HL****V**A**S**G**S****E**D**G**S**L**H**V**F**V****L**A**VE**M**L**Q**L**E**E**A**V****G**

*S.cerevisiae*      d5      a6      b6      c6      d6  
 930      940      950      960      970

*S.cerevisiae*    L**K**T**S**D...**F**I**AAA****A**S**ST**I**T****S****G**M**L**I**NG**G**K**E**V**I**T****T****S****VD****Q**V**I**R**A****WE**I**T**A**G**K**L**S**L****V**D**K**K  
*S.pombe*          N**S**L**H**N...**Y**F**FA**E**A**H**AS**S**V**T**G**V**L**S**I**T**K**E**L****L**S**V**S**I**D**Q**R**I**L**L****K**V**E**G**D**S**L**P**I**L**E**R  
*H.sapiens*        E**A**G**L**V**P**Q**L**R**V**L**E**E**Y**S**V**P**C****A**H**A**A**H**V**T****GL**K**I**L**S**P**S**I**M**V**S**A**S**I**D**Q**R**L**T**F**W**R**L**G**H**G**E**P**T**F**M****N**S**T**

*S.cerevisiae*      a7      b7      c7  
 980      990      1000      1010

*S.cerevisiae*    R**T**T**V**A**D**T**G**S**L**E**I**I**S**N**D**E**D**A**D**S**E**K**T**L**L**I**G**G**V**G**L**S**I**W**K**K.  
*S.pombe*          Y**TH**V**A**D**V**G...**G**M**I**R**N**N**D**F**L**I**I**Y**G**I**G**C**E**V**F**R**L**G**S**L**R**  
*H.sapiens*        V**F**H**V**P**D**V**A**D**M**D**C**W**P**V**S**P**E**F**G**H**R**C**AL**G**G**Q**G**L**E**V**Y**N**W**Y**D**.

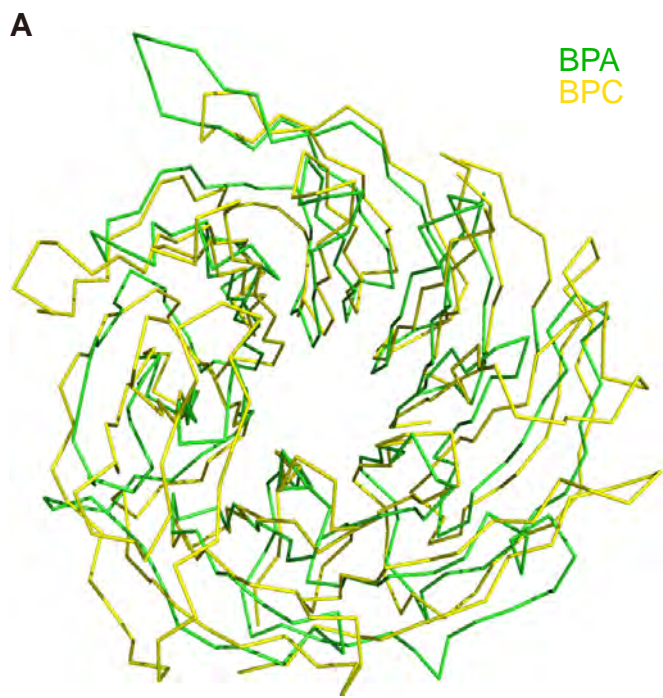

r.m.s.d= 2.29 Å

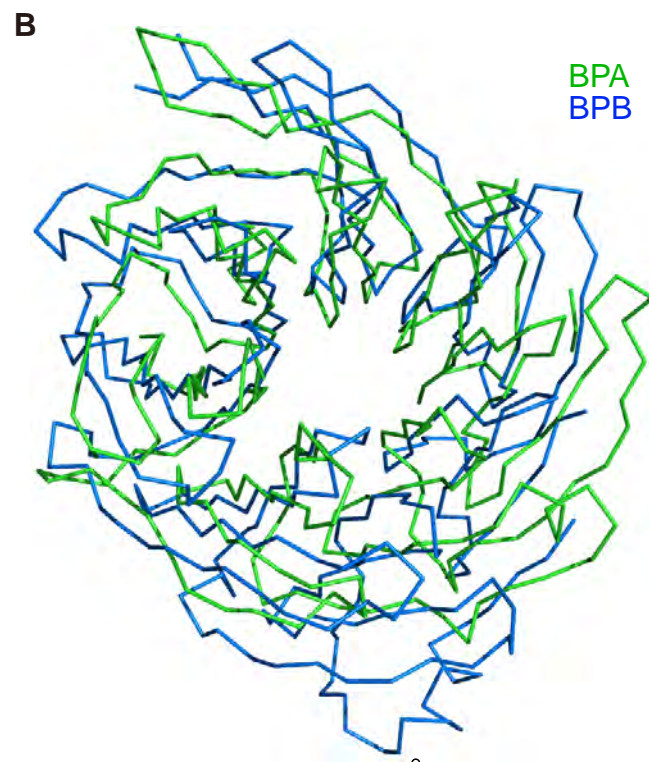

r.m.s.d= 3.34 Å

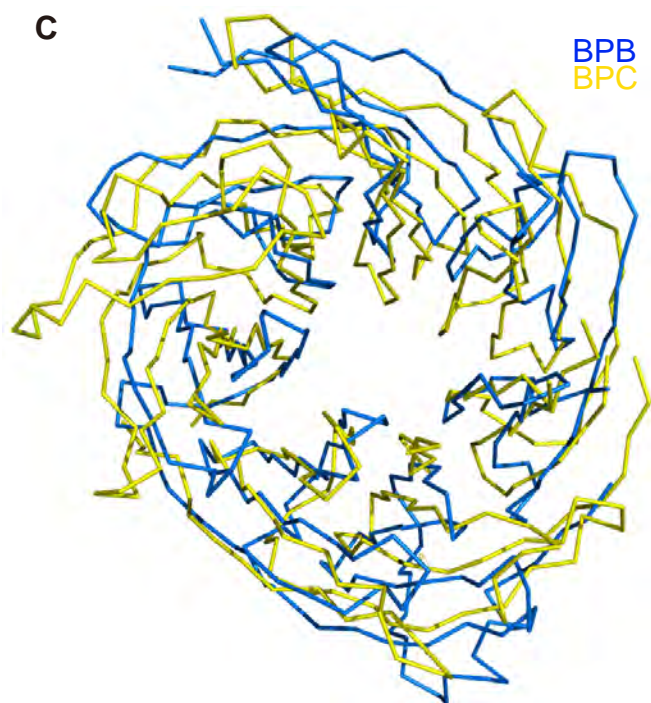

r.m.s.d= 3.14 Å

**Supplementary Figure S9**



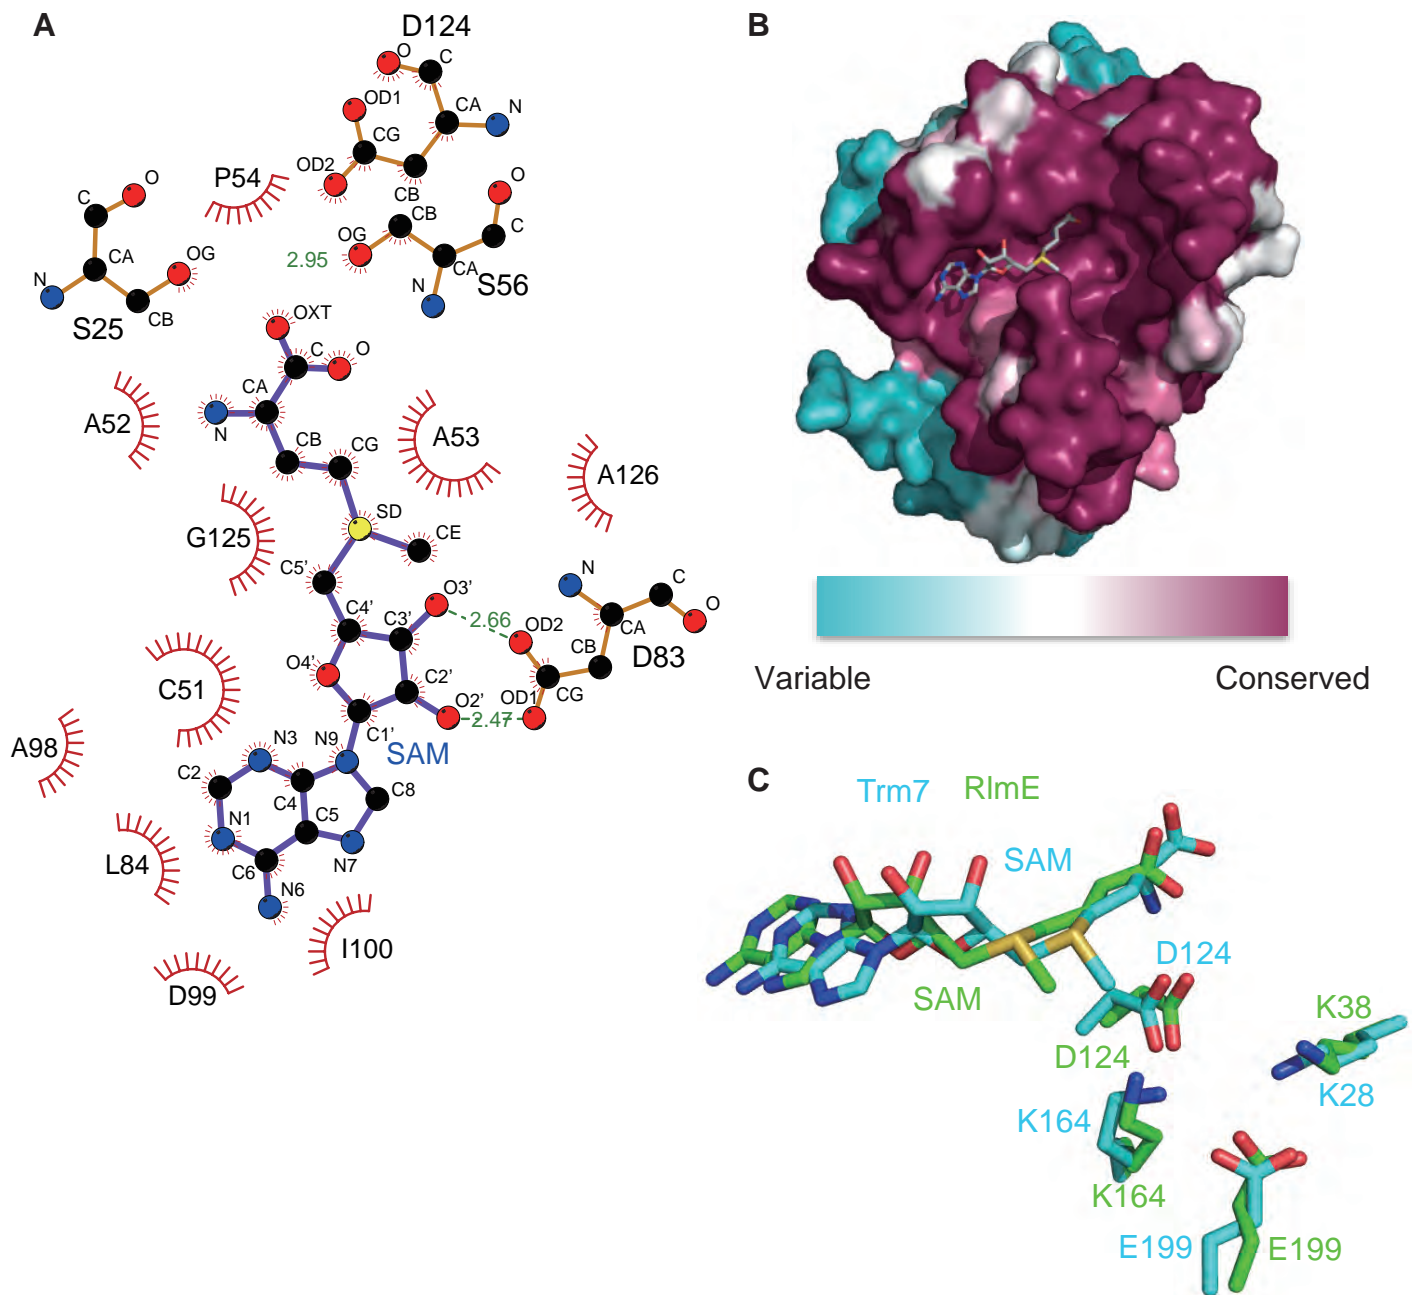

Supplementary Figure S10

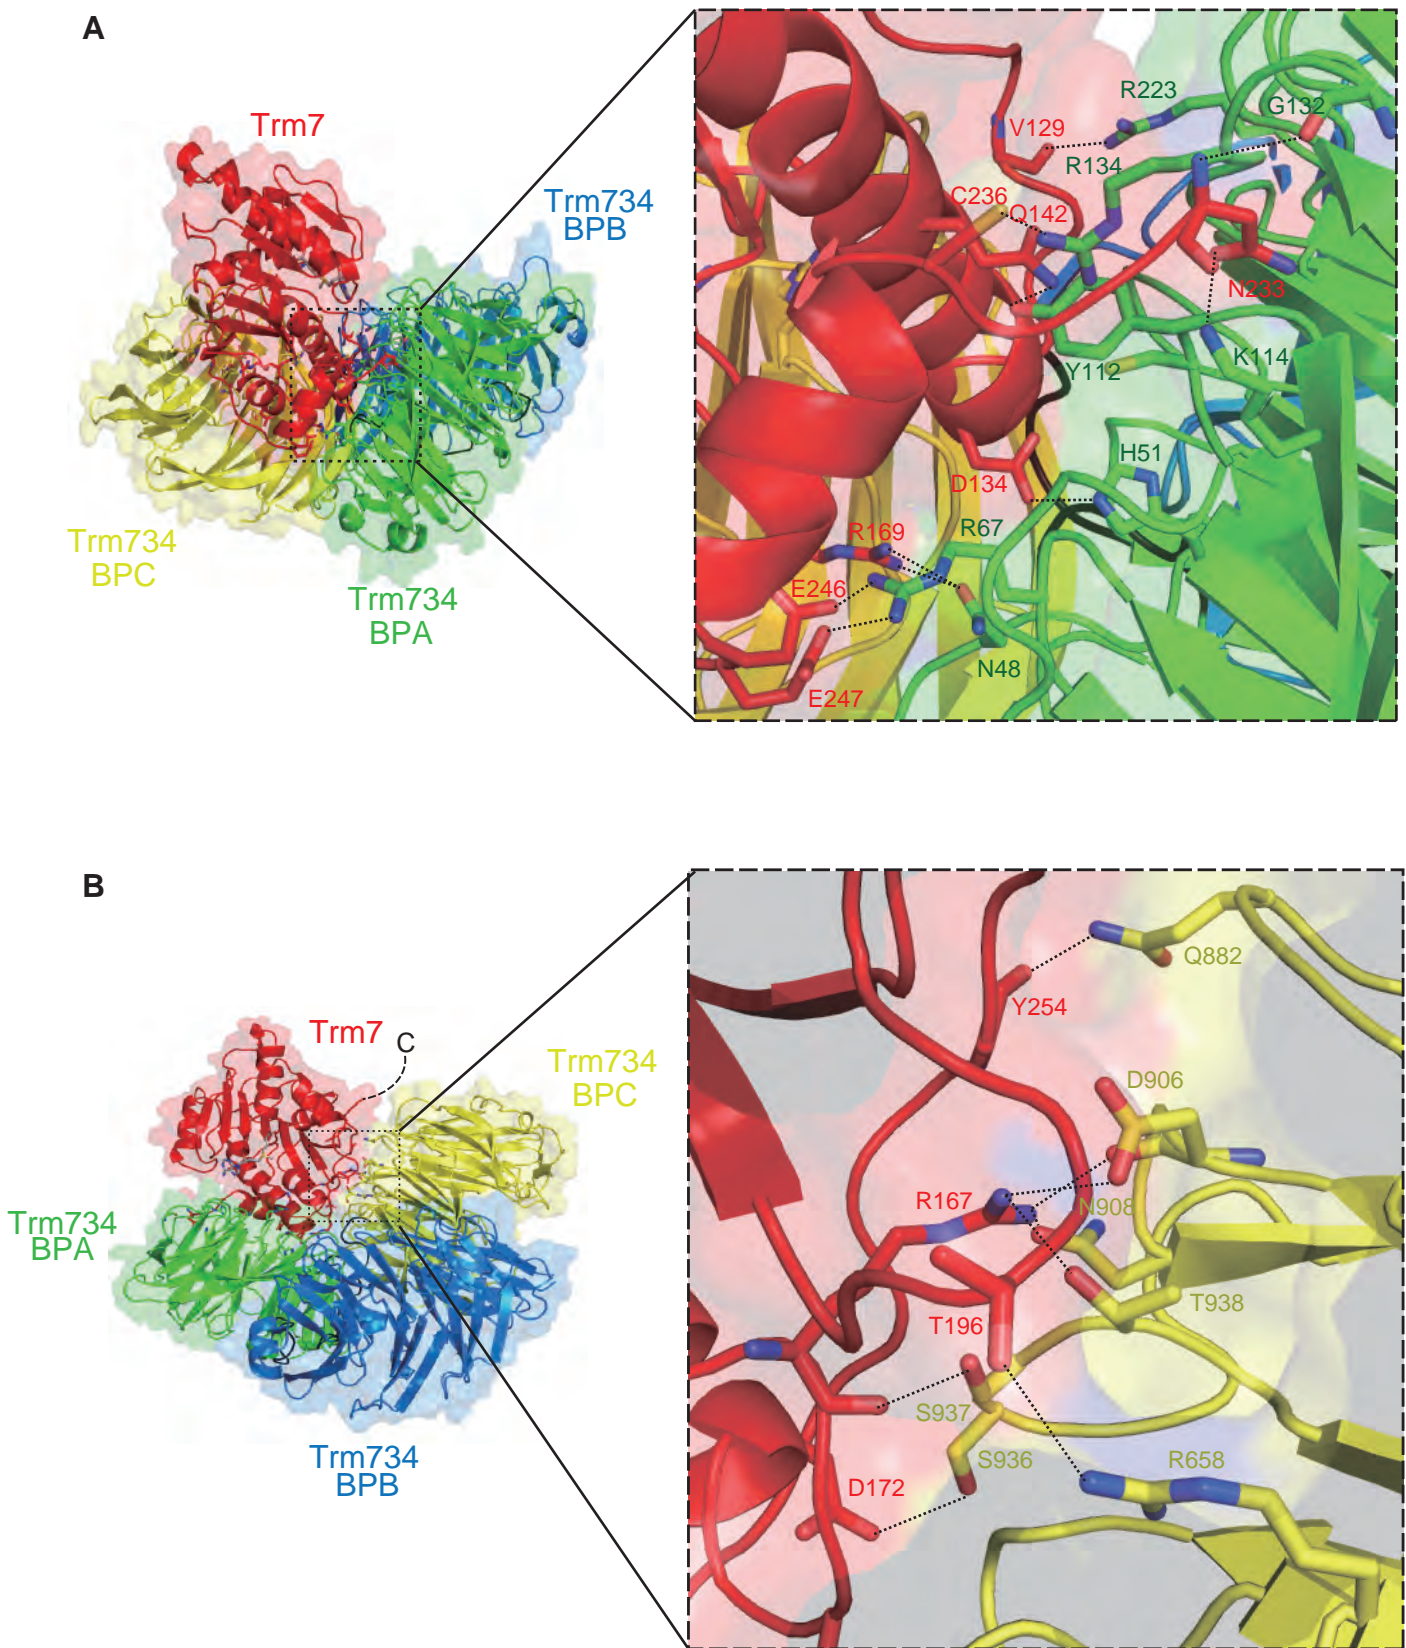

Supplementary Figure S11

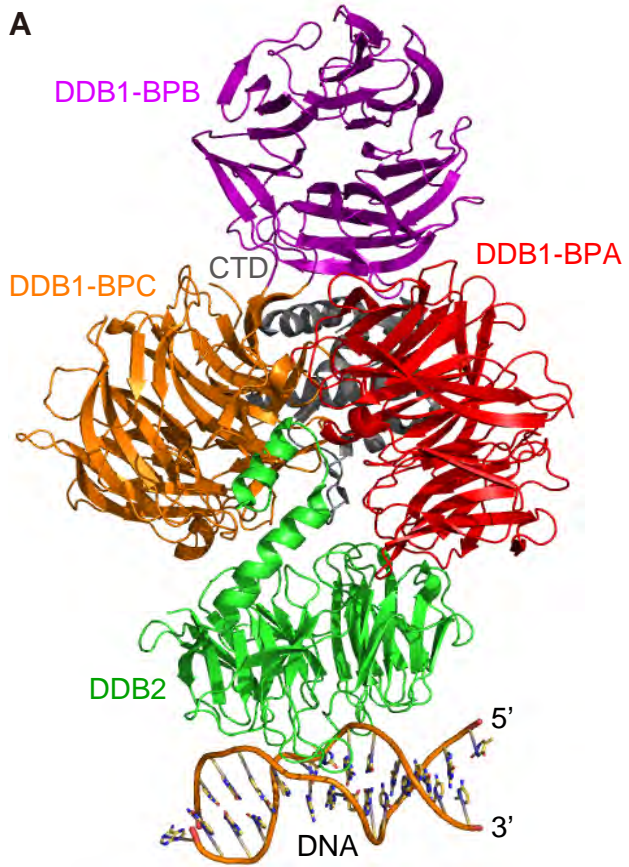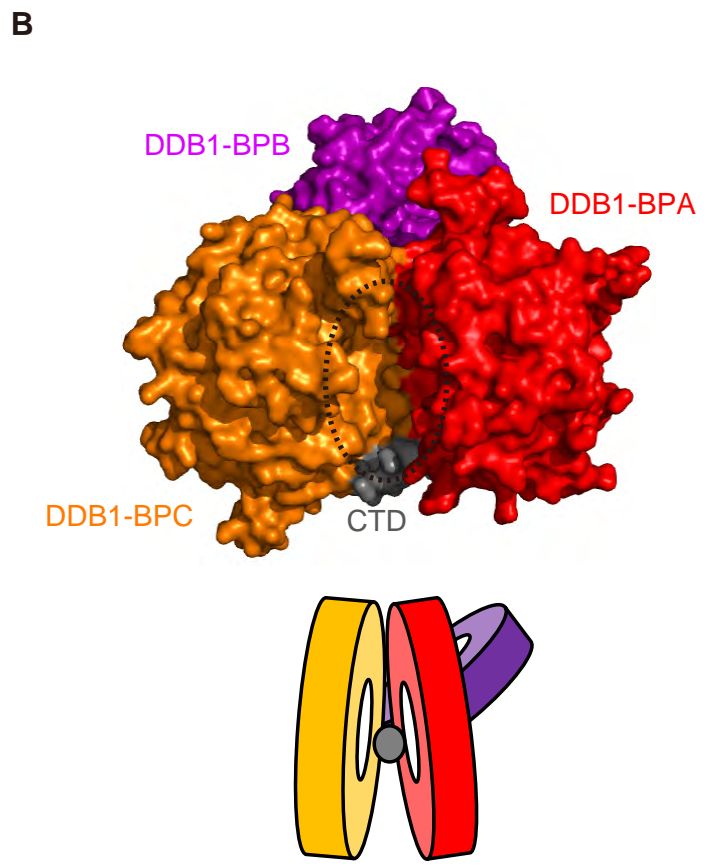

**Supplementary Figure S12**



Supplementary Figure S13

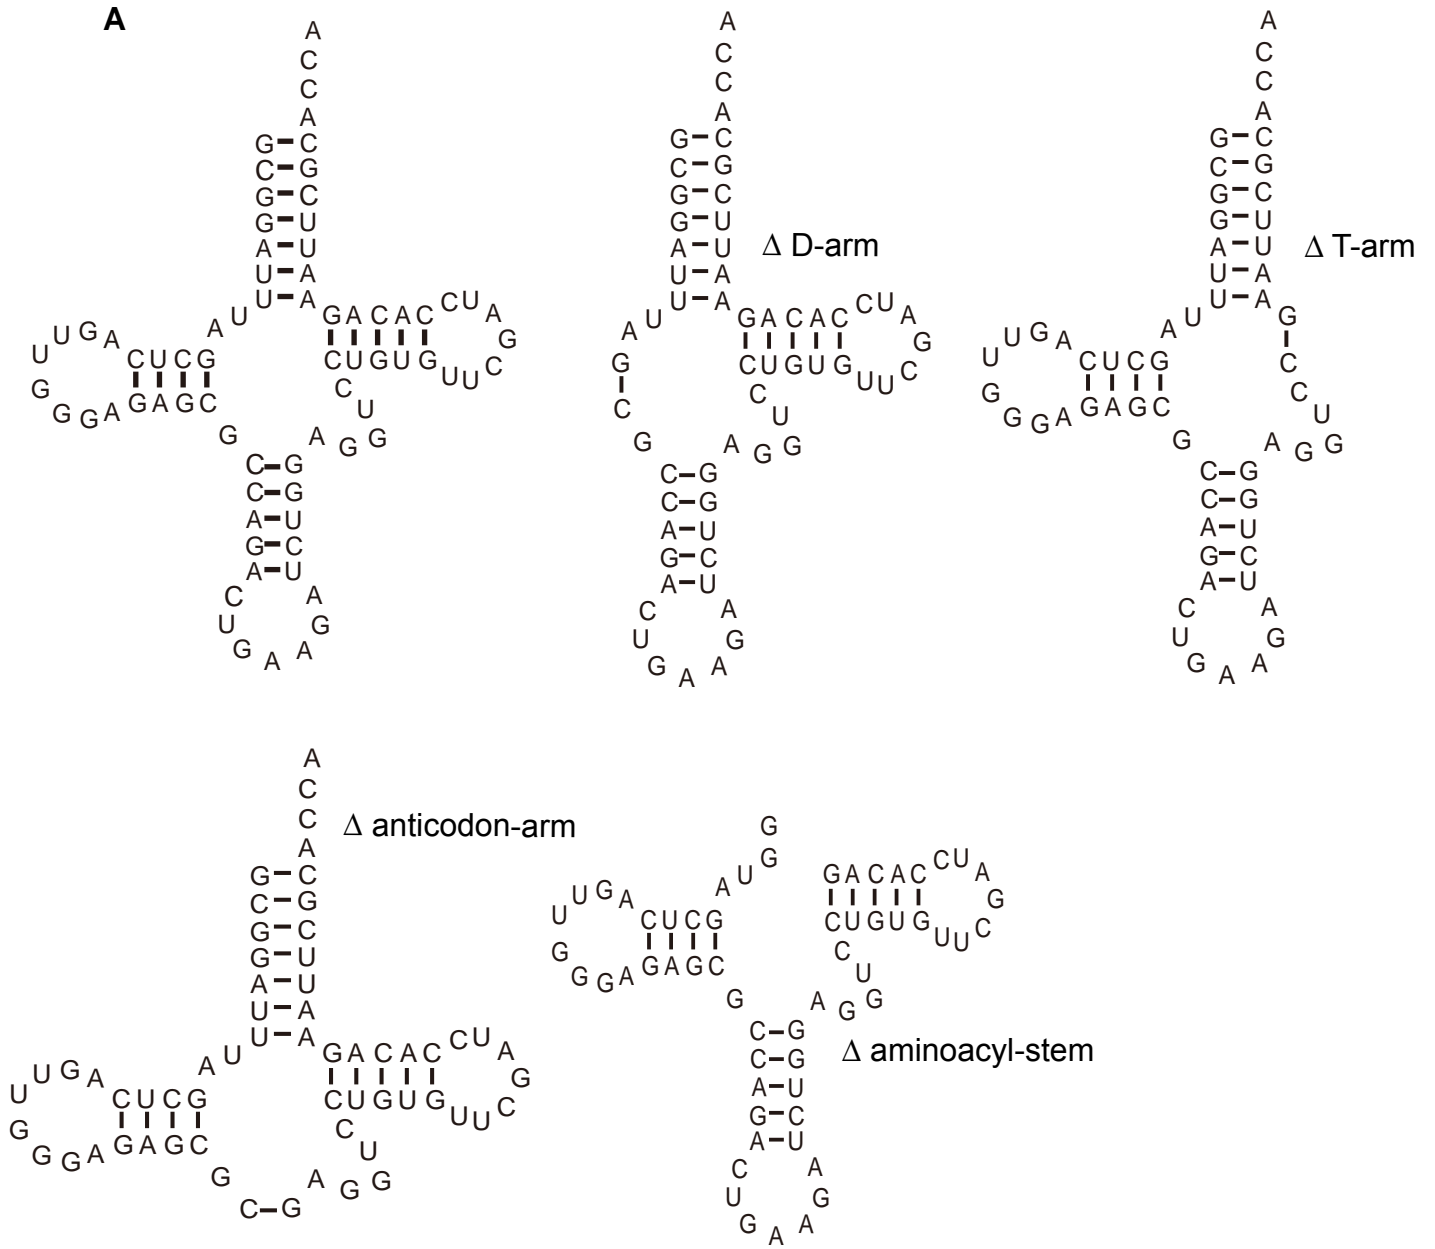

**B**

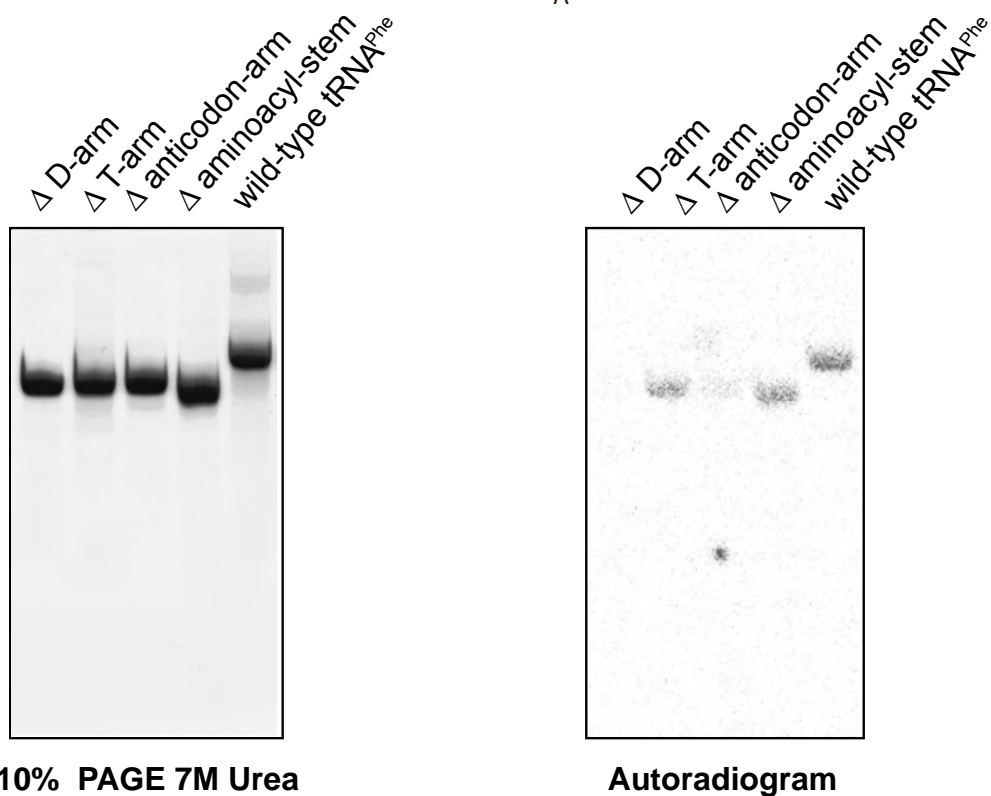

Supplement: gkz856_supplemental_file.pdf [file gkz856_supplemental_file.pdf]
